# Supplementary material for: Chroman-4-one and pyrano[4,3-b]chromenone derivatives from the mangrove endophytic fungus Diaporthe phaseolorum SKS019
Source: Royal Society of Chemistry journal article supplement (doi:10.1039/c7ra03032k), 2017-01-01
Supplement: c7ra03032k1.pdf [file c7ra03032k1.pdf]

## Supplementary Information

### **Chroman-4-one and pyrano[4, 3-b]chromenone derivatives from the mangrove endophytic fungus *Diaporthe phaseolorum* SKS019**

Hui Cui,<sup>a</sup> Meng Ding,<sup>a</sup> Dane Huang,<sup>b</sup> Zhengrui Zhang,<sup>a</sup> Huiting Liu,<sup>a</sup> Hongbo Huang,<sup>\*c</sup>  
and Zhigang She<sup>\*a</sup>

<sup>a</sup> School of Chemistry, Sun Yat-Sen University, Guangzhou 510275, China.

<sup>b</sup> School of Pharmaceutical Sciences, Sun Yat-Sen University, Guangzhou 510080,  
China.

<sup>c</sup> CAS Key Laboratory of Tropical Marine Bio-resources and Ecology, Guangdong.

Key Laboratory of Marine Materia Medica, South China Sea Institute of Oceanology,  
Chinese Academy of Sciences, Guangzhou 510301, China.

\* To whom correspondence should be addressed. Tel/Fax: +86-20-34066449 (H. H.);  
+86-20-84113356 (Z. S.). E-mail: [huanghb@scsio.ac.cn](mailto:huanghb@scsio.ac.cn) (H. H.); [cesshzhg@sysu.edu.cn](mailto:cesshzhg@sysu.edu.cn)  
(Z. S.).

## Contents

- Figure S1 HRESIMS of diaporchromanone A (**1**)
- Figure S2  $^1\text{H}$  NMR spectrum (500 MHz,  $\text{CDCl}_3$ ) of diaporchromanone A (**1**)
- Figure S3  $^{13}\text{C}$  NMR spectrum (125 MHz,  $\text{CDCl}_3$ ) of diaporchromanone A (**1**)
- Figure S4 DEPT NMR spectrum (125 MHz,  $\text{CDCl}_3$ ) of diaporchromanone A (**1**)
- Figure S5  $^1\text{H}$ - $^1\text{H}$  COSY spectrum (500 MHz,  $\text{CDCl}_3$ ) of diaporchromanone A (**1**)
- Figure S6 HSQC spectrum (500 MHz,  $\text{CDCl}_3$ ) of diaporchromanone A (**1**)
- Figure S7 HMBC spectrum (500 MHz,  $\text{CDCl}_3$ ) of diaporchromanone A (**1**)
- Figure S8 HRESIMS of diaporchromanone B (**2**)
- Figure S9  $^1\text{H}$  NMR spectrum (500 MHz,  $\text{CDCl}_3$ ) of diaporchromanone B (**2**)
- Figure S10  $^{13}\text{C}$  NMR spectrum (125 MHz,  $\text{CDCl}_3$ ) of diaporchromanone B (**2**)
- Figure S11  $^1\text{H}$ - $^1\text{H}$  COSY spectrum (500 MHz,  $\text{CDCl}_3$ ) of diaporchromanone B (**2**)
- Figure S12 HSQC spectrum (500 MHz,  $\text{CDCl}_3$ ) of diaporchromanone B (**2**)
- Figure S13 HMBC spectrum (500 MHz,  $\text{CDCl}_3$ ) of diaporchromanone B (**2**)
- Figure S14 HRESIMS of diaporchromanone C (**3**)
- Figure S15  $^1\text{H}$  NMR spectrum (500 MHz,  $\text{CDCl}_3$ ) of diaporchromanone C (**3**)
- Figure S16  $^{13}\text{C}$  NMR spectrum (125 MHz,  $\text{CDCl}_3$ ) of diaporchromanone C (**3**)
- Figure S17  $^1\text{H}$ - $^1\text{H}$  COSY spectrum (500 MHz,  $\text{CDCl}_3$ ) of diaporchromanone C (**3**)
- Figure S18 HSQC spectrum (500 MHz,  $\text{CDCl}_3$ ) of diaporchromanone C (**3**)
- Figure S19 HMBC spectrum (500 MHz,  $\text{CDCl}_3$ ) of diaporchromanone C (**3**)
- Figure S20 HRESIMS of diaporchromanone D (**4**)
- Figure S21  $^1\text{H}$  NMR spectrum (500MHz,  $\text{CDCl}_3$ ) of diaporchromanone D (**4**)
- Figure S22  $^{13}\text{C}$  NMR spectrum (125 MHz,  $\text{CDCl}_3$ ) of diaporchromanone D (**4**)
- Figure S23  $^1\text{H}$ - $^1\text{H}$  COSY spectrum (500 MHz,  $\text{CDCl}_3$ ) of diaporchromanone D (**4**)
- Figure S24 HSQC spectrum (500 MHz,  $\text{CDCl}_3$ ) of diaporchromanone D (**4**)
- Figure S25 HMBC spectrum (500 MHz,  $\text{CDCl}_3$ ) of diaporchromanone D (**4**)
- Figure S26 HRESIMS of (-)-phomopsichin A (**5a**)
- Figure S27  $^1\text{H}$  NMR spectrum (500 MHz, acetone- $d_6$ ) of (-)-phomopsichin A (**5a**)
- Figure S28  $^{13}\text{C}$  NMR spectrum (125 MHz, acetone- $d_6$ ) of (-)-phomopsichin A (**5a**)
- Figure S29  $^1\text{H}$ - $^1\text{H}$  COSY spectrum (500 MHz, acetone- $d_6$ ) of (-)-phomopsichin A (**5a**)
- Figure S30 HSQC spectrum (500 MHz, acetone- $d_6$ ) of (-)-phomopsichin A (**5a**)
- Figure S31 HMBC spectrum (500 MHz, acetone- $d_6$ ) of (-)-phomopsichin A (**5a**)
- Figure S32 HRESIMS of (+)-phomopsichin B (**6a**)
- Figure S33  $^1\text{H}$  NMR spectrum (500MHz,  $\text{CDCl}_3$ ) of (+)-phomopsichin B (**6a**)
- Figure S34  $^{13}\text{C}$  NMR spectrum (125 MHz,  $\text{CDCl}_3$ ) of (+)-phomopsichin B (**6a**)
- Figure S35  $^1\text{H}$ - $^1\text{H}$  COSY spectrum (500 MHz,  $\text{CDCl}_3$ ) of (+)-phomopsichin B (**6a**)
- Figure S36 HSQC spectrum (500 MHz,  $\text{CDCl}_3$ ) of (+)-phomopsichin B (**6a**)
- Figure S37 HMBC spectrum (500 MHz,  $\text{CDCl}_3$ ) of (+)-phomopsichin B (**6a**)
- Figure S38 HRESIMS of ( $\pm$ )-diaporchromone A (**7**)
- Figure S39  $^1\text{H}$  NMR spectrum (500MHz,  $\text{CDCl}_3$ ) of ( $\pm$ )-diaporchromone A (**7**)
- Figure S40  $^{13}\text{C}$  NMR spectrum (125 MHz,  $\text{CDCl}_3$ ) of ( $\pm$ )-diaporchromone A (**7**)

Figure S41 HSQC spectrum (500 MHz, CDCl<sub>3</sub>) of (±)-diaporchromone A (**7**)

Figure S42 HMBC spectrum (500 MHz, CDCl<sub>3</sub>) of (±)-diaporchromone A (**7**)

Figure S43 ECD Calculation section

Figure S1 HRESIMS of diaporchromanone A (1)

SYNAPT G2-Si#UGA489

160422-S-8c2.40 (0.166) Cm (38.42)

1: TOF MS ES-  
1.42e7

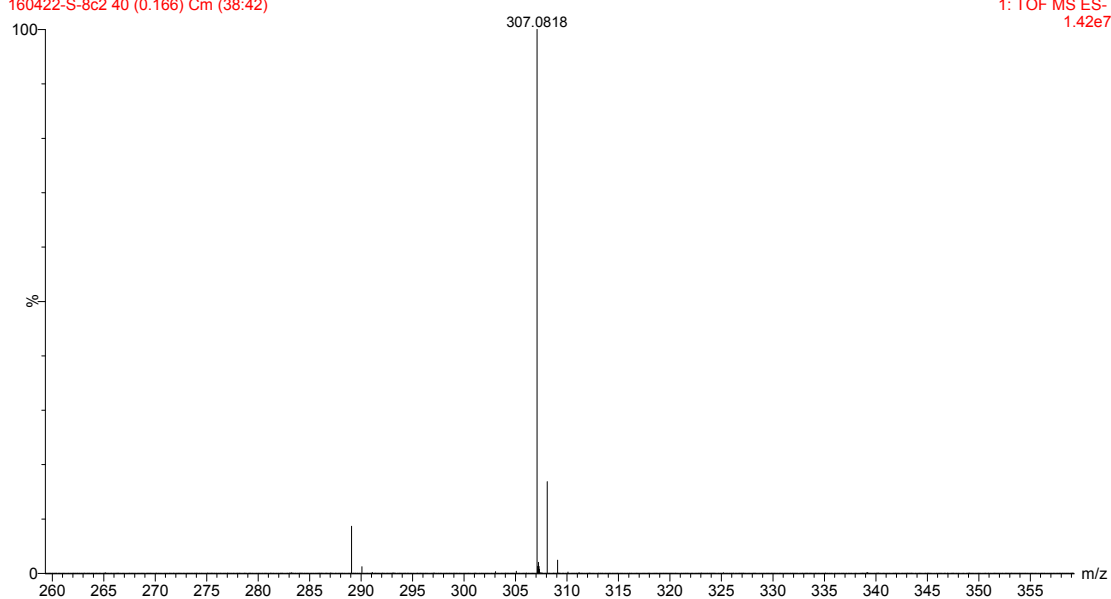

#### Elemental Composition Report

##### Single Mass Analysis

Tolerance = 4.0 PPM / DBE: min = -1.5, max = 50.0

Elements Used:

C: 0-50 H: 0-100 O: 0-50

| Mass     | Calc. Mass | mDa | PPM | DBE | Formula                                        |
|----------|------------|-----|-----|-----|------------------------------------------------|
| 307.0818 | 307.0818   | 0.0 | 0.0 | 8.5 | C <sub>15</sub> H <sub>15</sub> O <sub>7</sub> |

Figure S2 <sup>1</sup>H NMR spectrum (500 MHz, CDCl<sub>3</sub>) of diaporchromanone A (**1**)

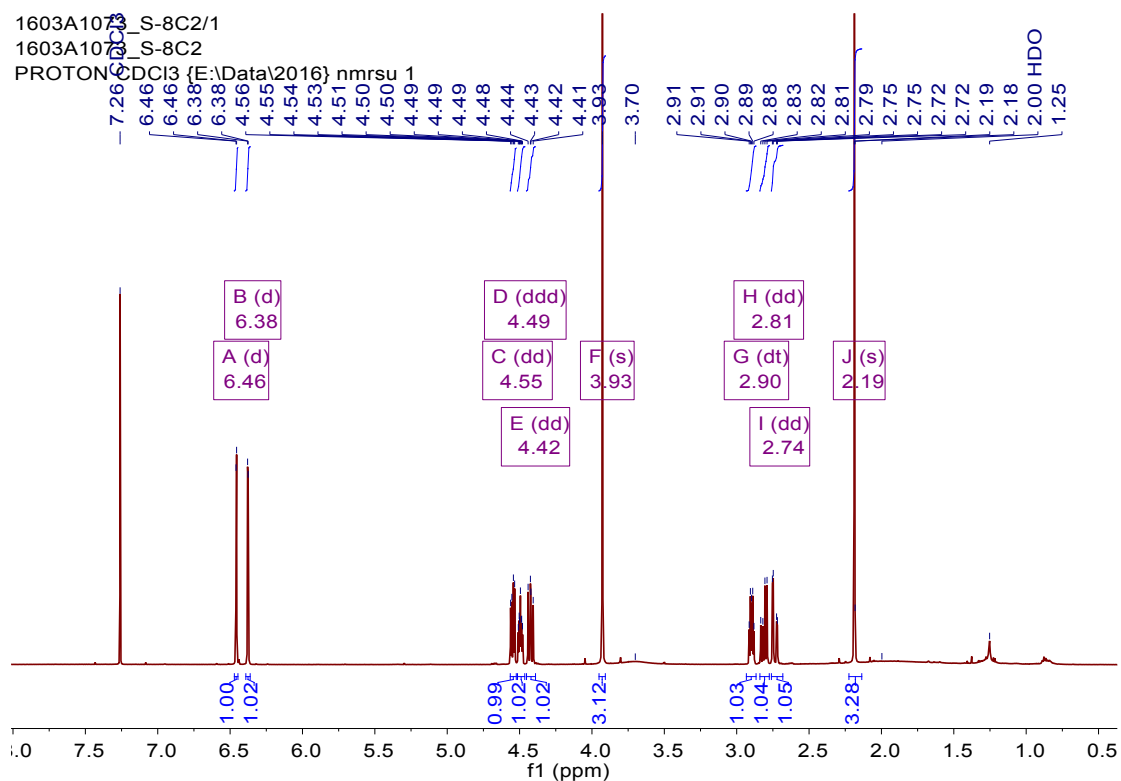

Figure S3 <sup>13</sup>C NMR spectrum (125 MHz, CDCl<sub>3</sub>) of diaporchromanone A (**1**)

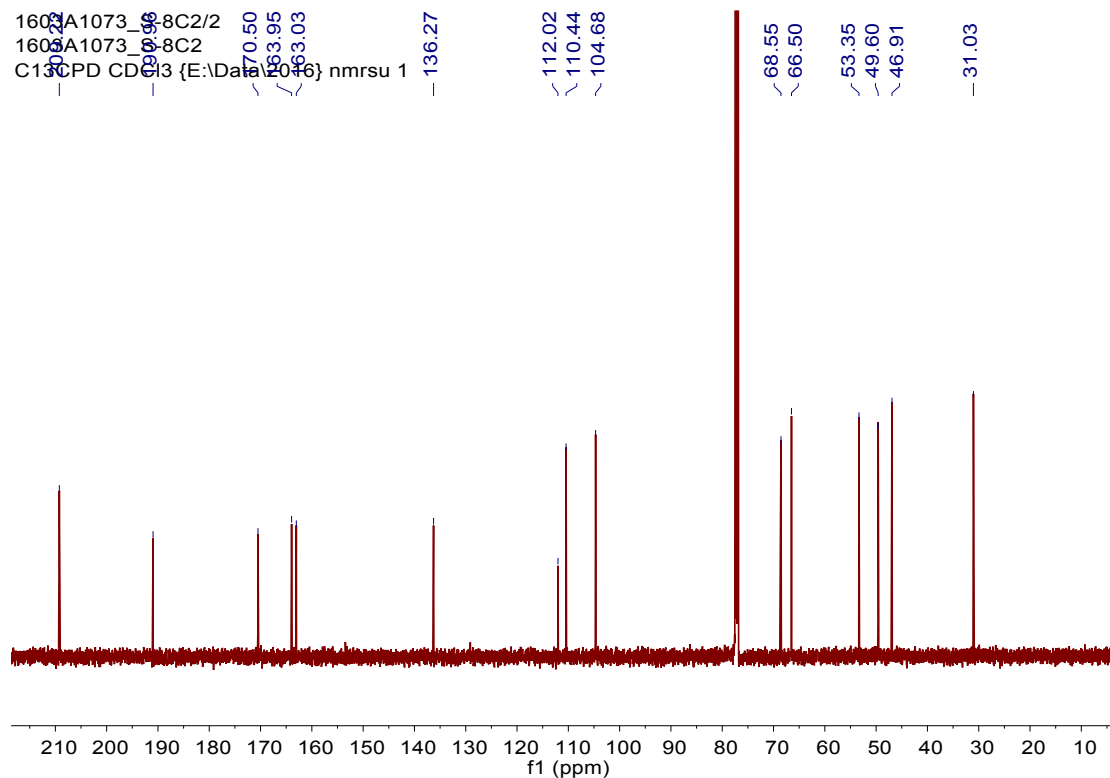

Figure S4 DEPT NMR spectrum (125 MHz, CDCl<sub>3</sub>) of diaporchromanone A (**1**)

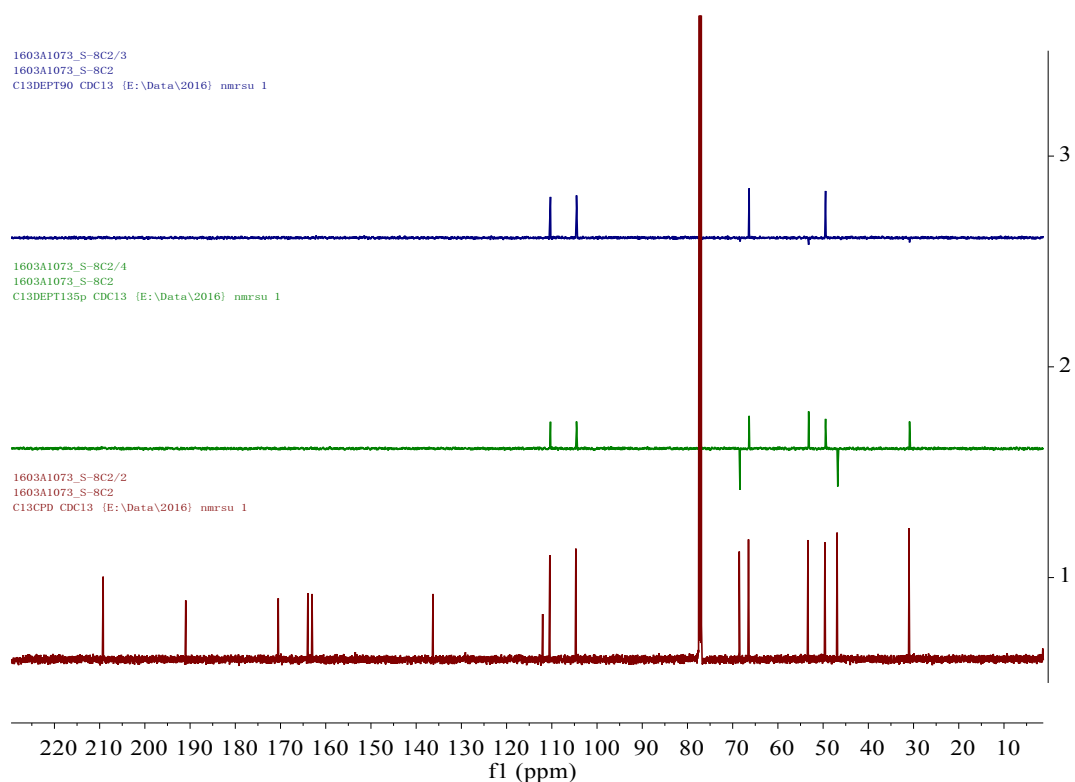

Figure S5 <sup>1</sup>H-<sup>1</sup>H COSY spectrum (500 MHz, CDCl<sub>3</sub>) of diaporchromanone A (**1**)

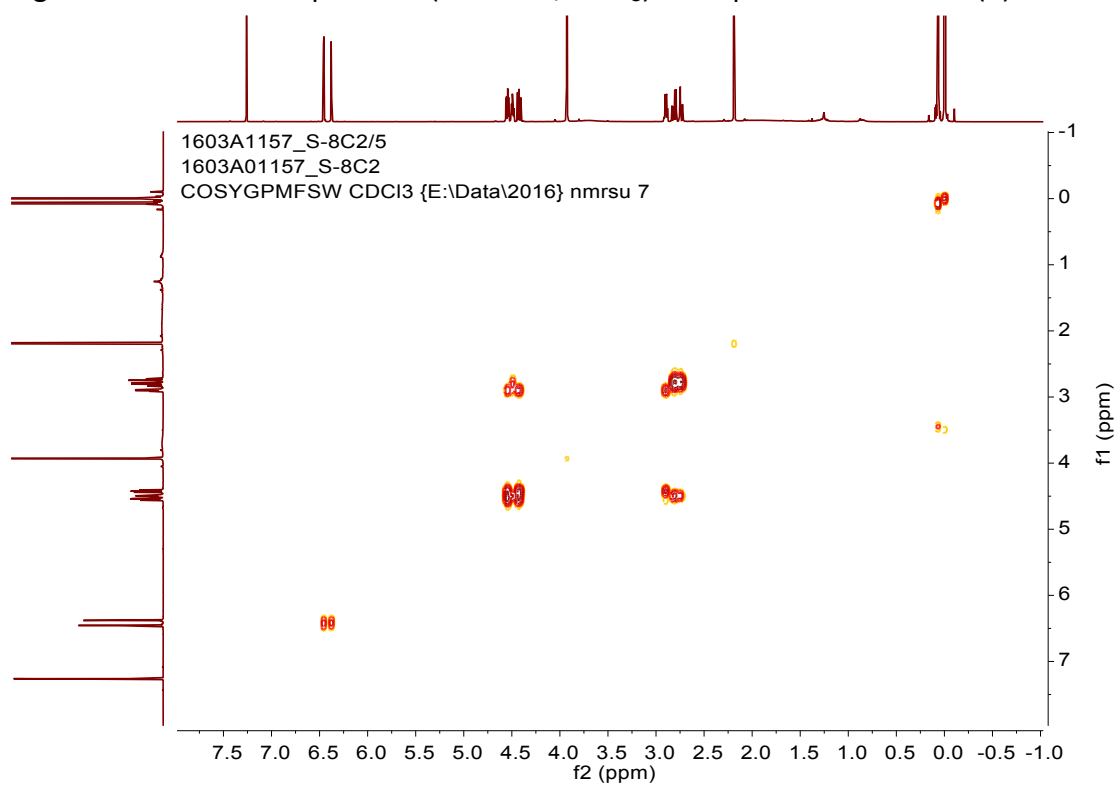

Figure S6 HSQC spectrum (500 MHz, CDCl<sub>3</sub>) of diaporchromanone A (**1**)

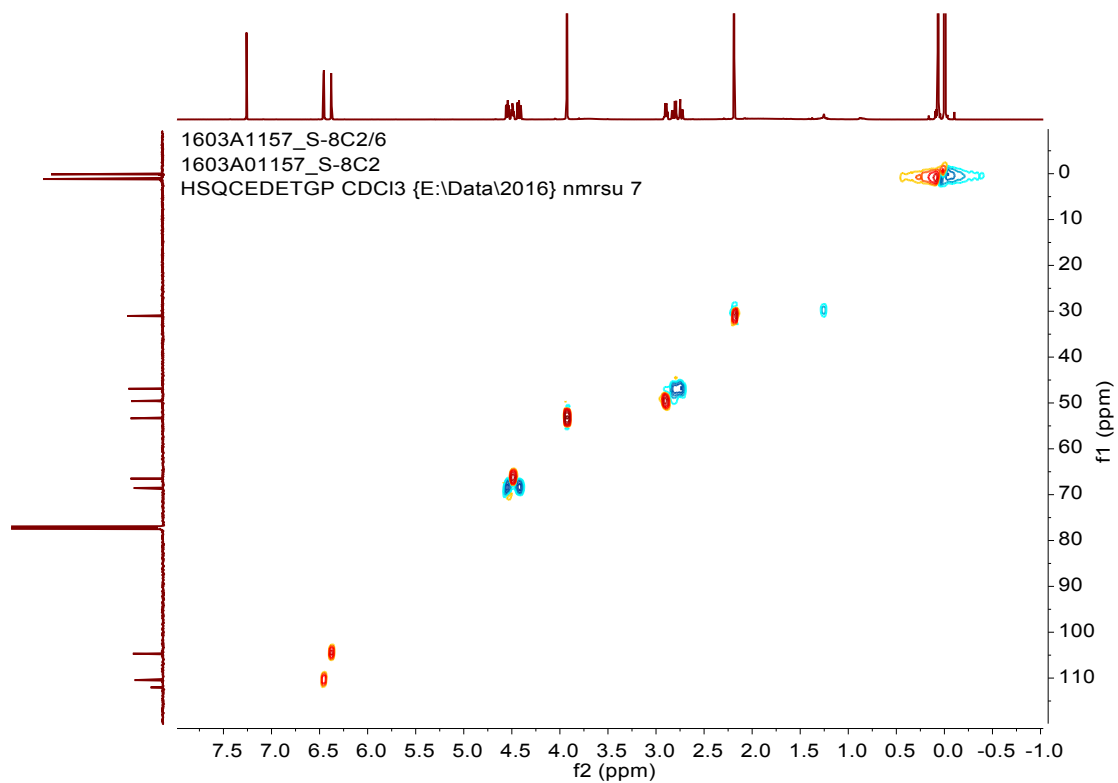

Figure S7 HMBC spectrum (500 MHz, CDCl<sub>3</sub>) of diaporchromanone A (**1**)

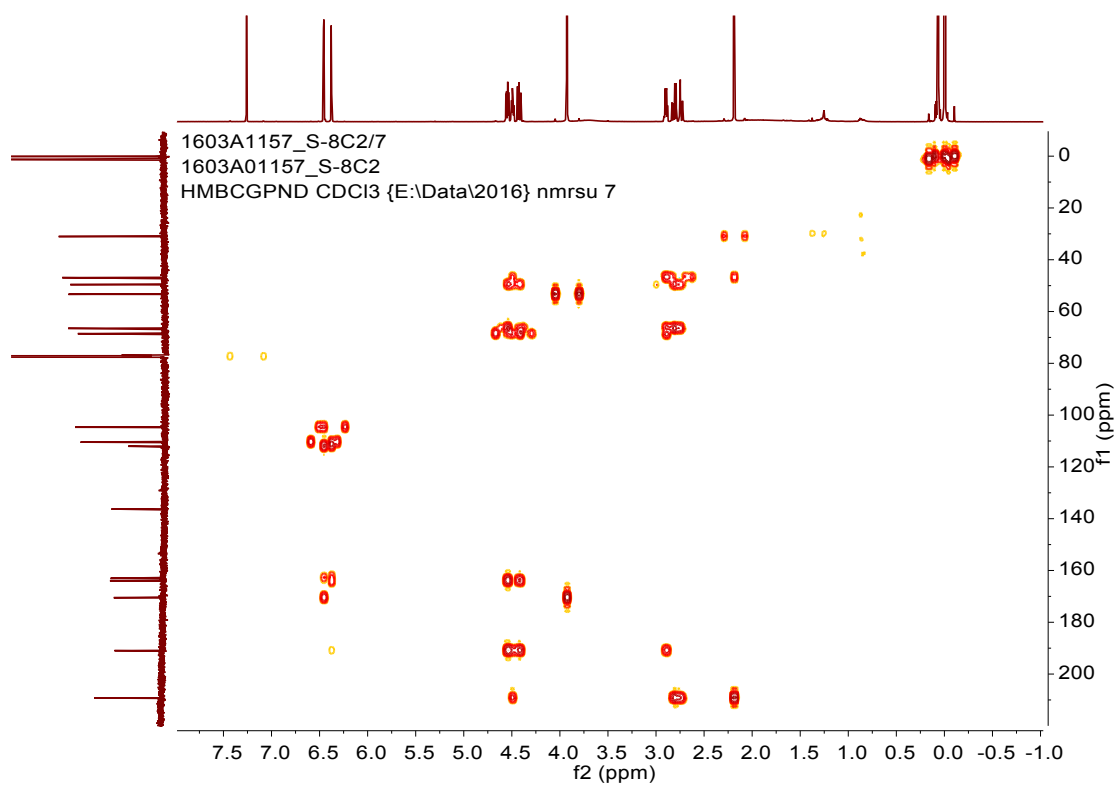

Figure S8 HRESIMS of diaporchromanone B (2)

SYNAPT G2-Si#UGA489

160422-S-8c3 33 (0.141) Cm (28:38)

1: TOF MS ES-  
2.50e6

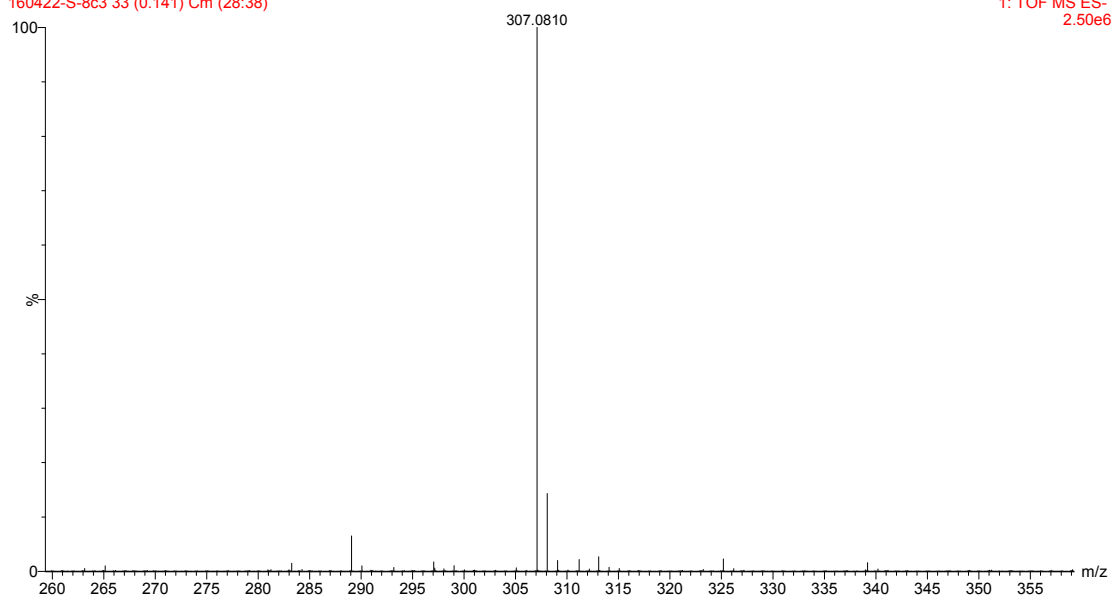

### Elemental Composition Report

#### Single Mass Analysis

Tolerance = 4.0 PPM / DBE: min = -1.5, max = 50.0

Elements Used:

C: 0-50 H: 0-100 O: 0-50

| Mass     | Calc. Mass | mDa  | PPM  | DBE | Formula                                        |
|----------|------------|------|------|-----|------------------------------------------------|
| 307.0810 | 307.0818   | -0.8 | -2.6 | 8.5 | C <sub>15</sub> H <sub>15</sub> O <sub>7</sub> |



Figure S9  $^1\text{H}$  NMR spectrum (500 MHz, acetone- $d_6$ ) of diaporchromanone B (**2**)

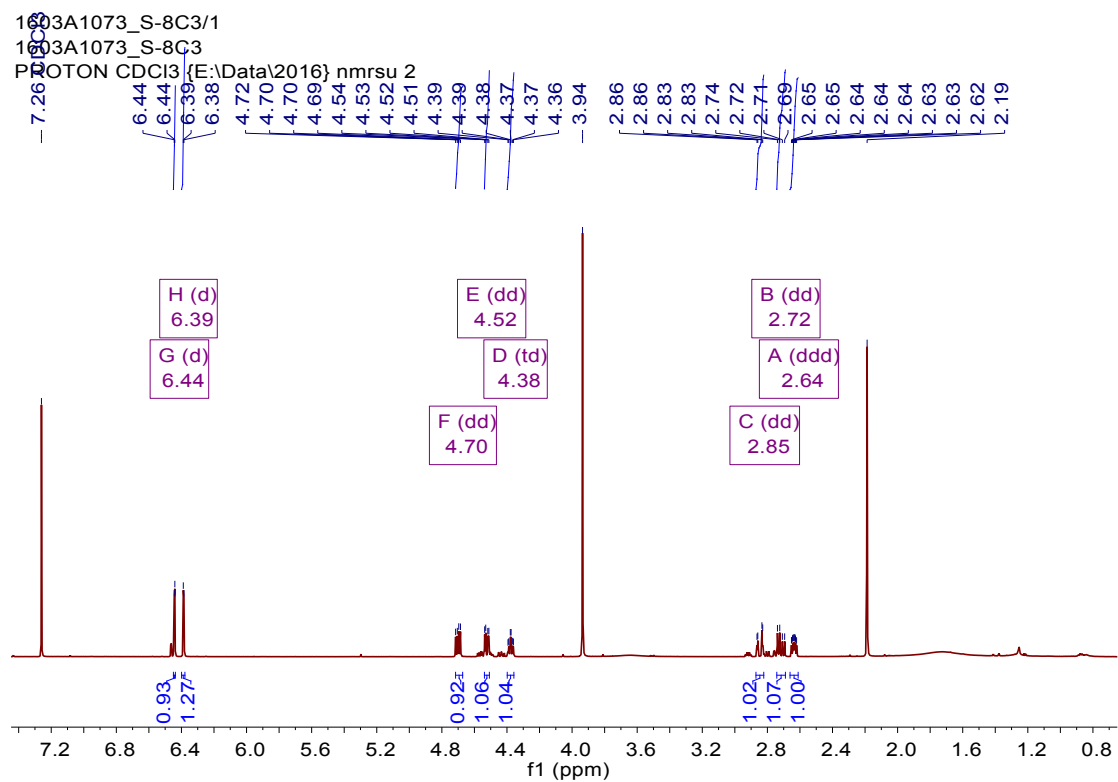

Figure S10  $^{13}\text{C}$  NMR spectrum (125 MHz, acetone- $d_6$ ) of diaporchromanone B (**2**)

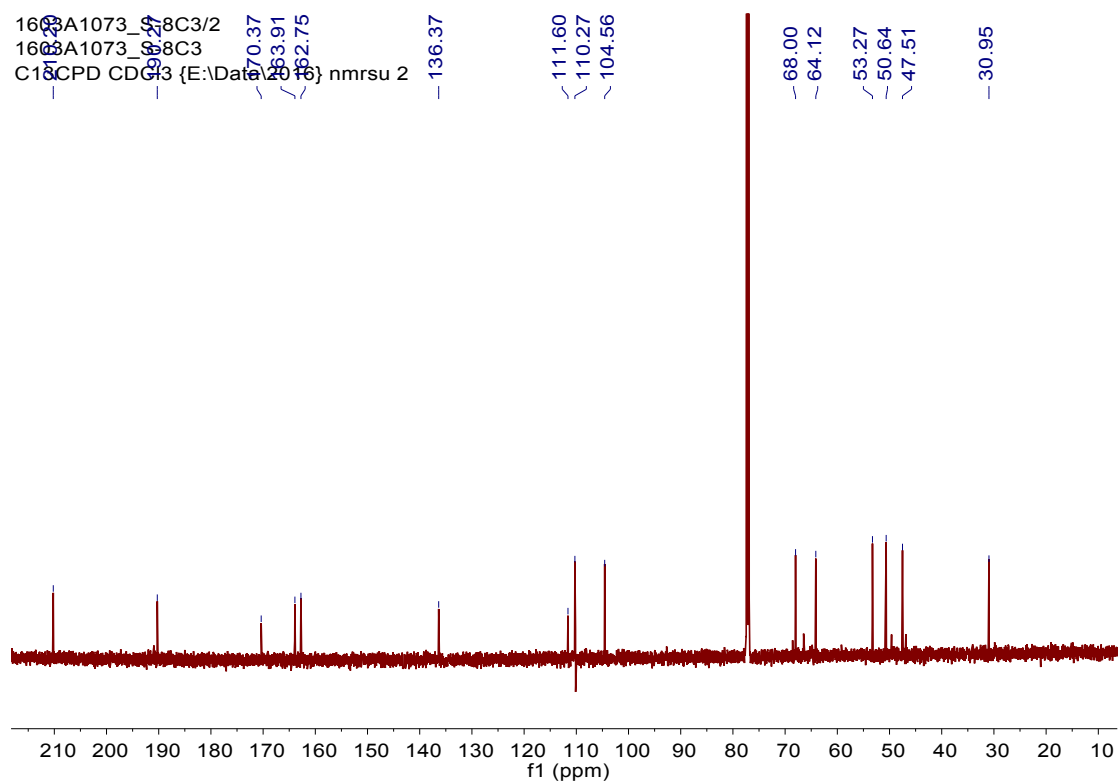

Figure S11  $^1\text{H}$ - $^1\text{H}$  COSY spectrum (500 MHz,  $\text{CDCl}_3$ ) of diaporchromanone B (**2**)

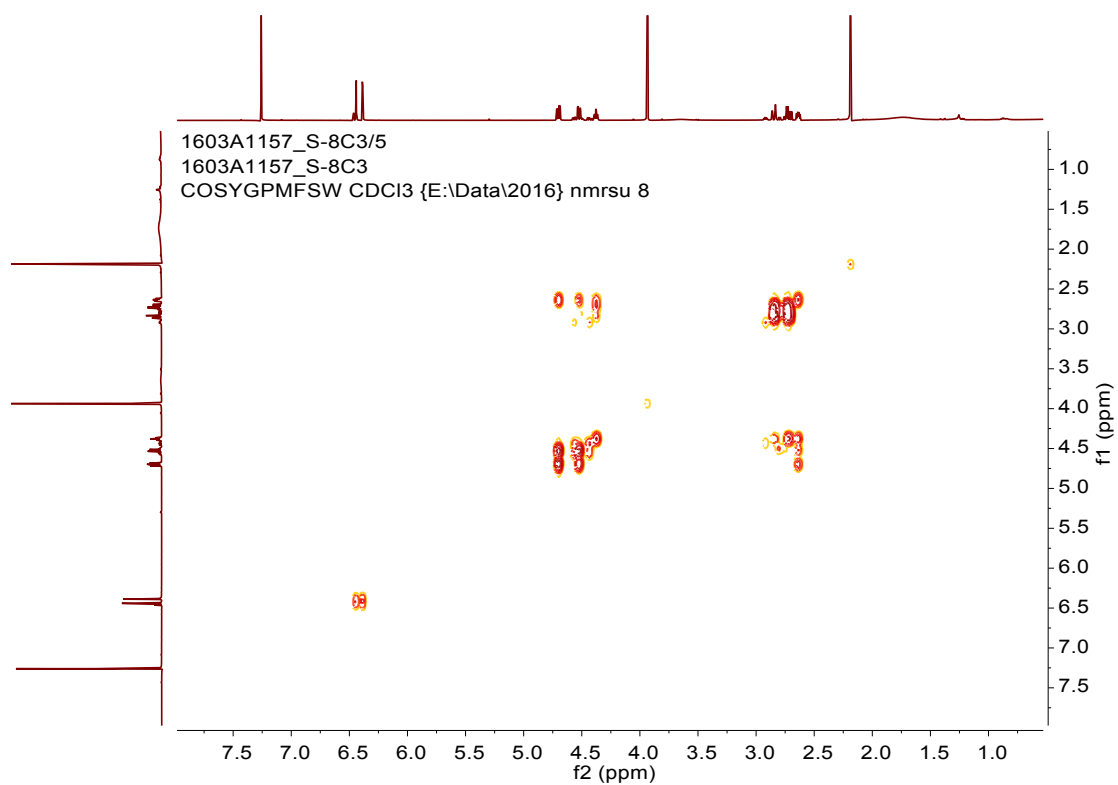

Figure S12 HSQC spectrum (500 MHz,  $\text{CDCl}_3$ ) of diaporchromanone B (**2**)

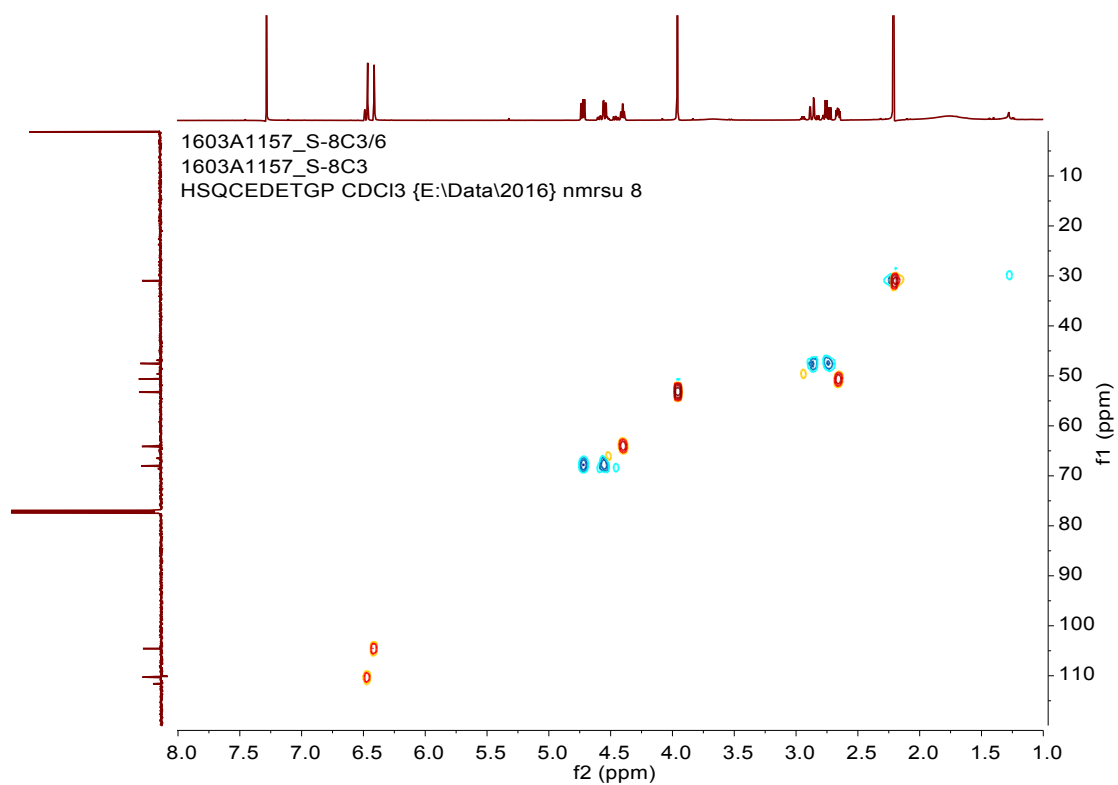

Figure S13 HMBC spectrum (500 MHz, CDCl<sub>3</sub>) of diaporchromanone B (**2**)

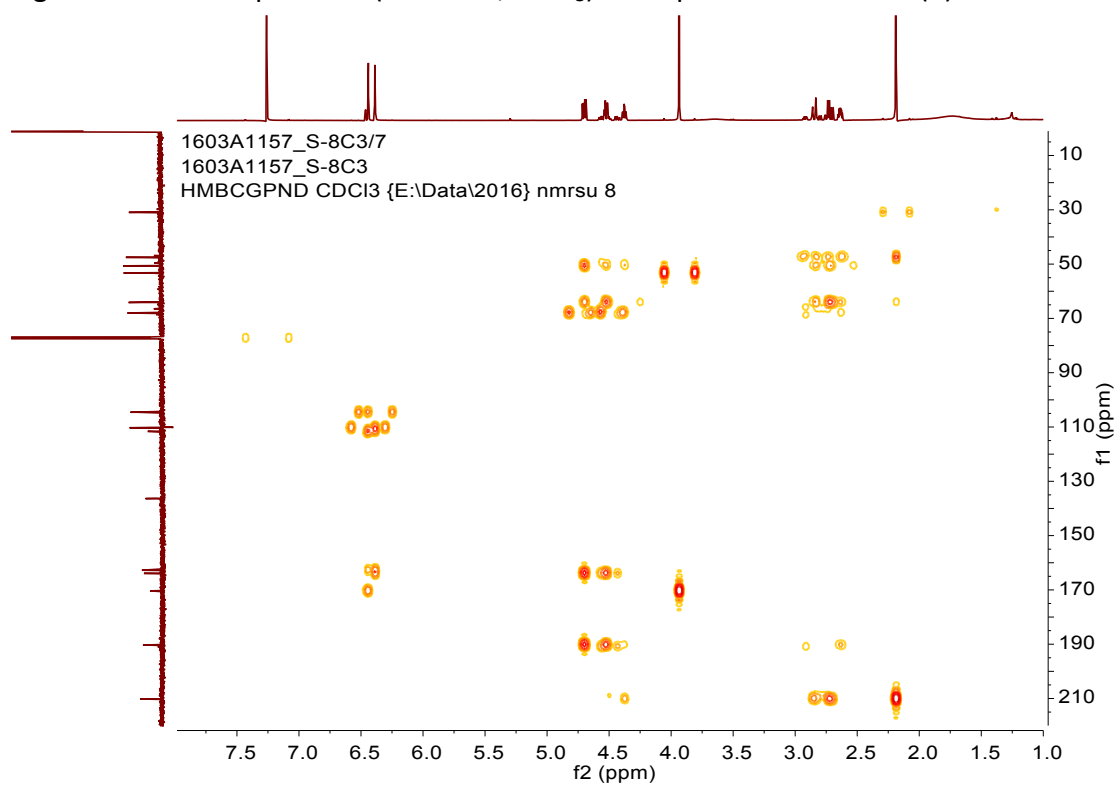

Figure S14 HRESIMS of diaporchromanone C (**3**)

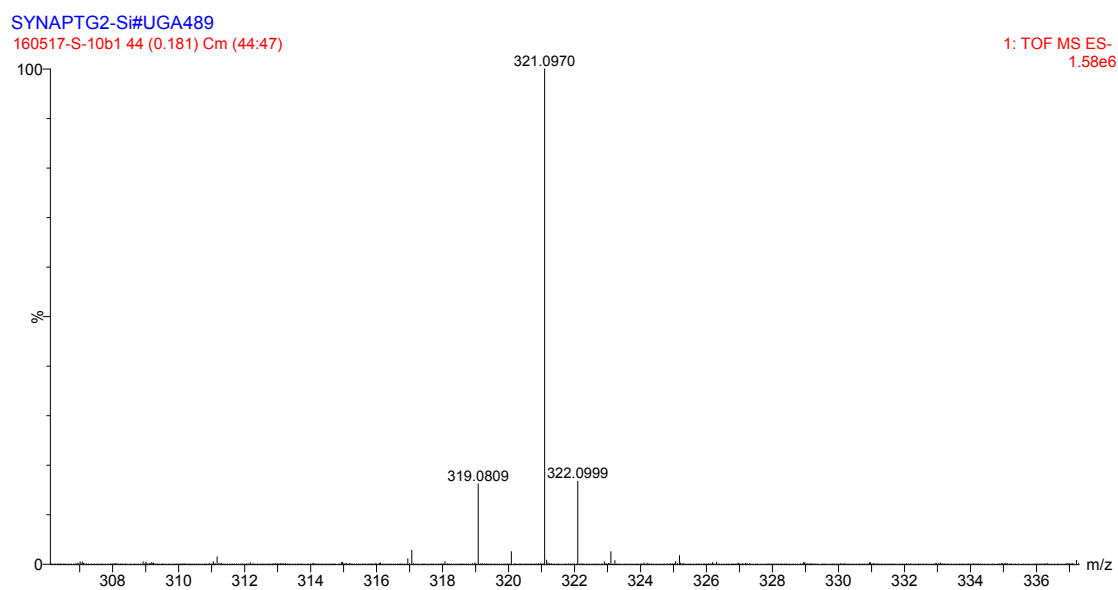

### Elemental Composition Report

#### Single Mass Analysis

Tolerance = 5.0 PPM / DBE: min = -1.5, max = 50.0

Elements Used: C: 0-50 H: 0-100 O: 0-50

| Mass     | Calc. Mass | mDa  | PPM  | DBE | Formula                                        |
|----------|------------|------|------|-----|------------------------------------------------|
| 321.0970 | 321.0974   | -0.4 | -1.2 | 8.5 | C <sub>16</sub> H <sub>17</sub> O <sub>7</sub> |

Figure S15 <sup>1</sup>H NMR spectrum (500MHz, CDCl<sub>3</sub>) of diaporchromanone C (**3**)

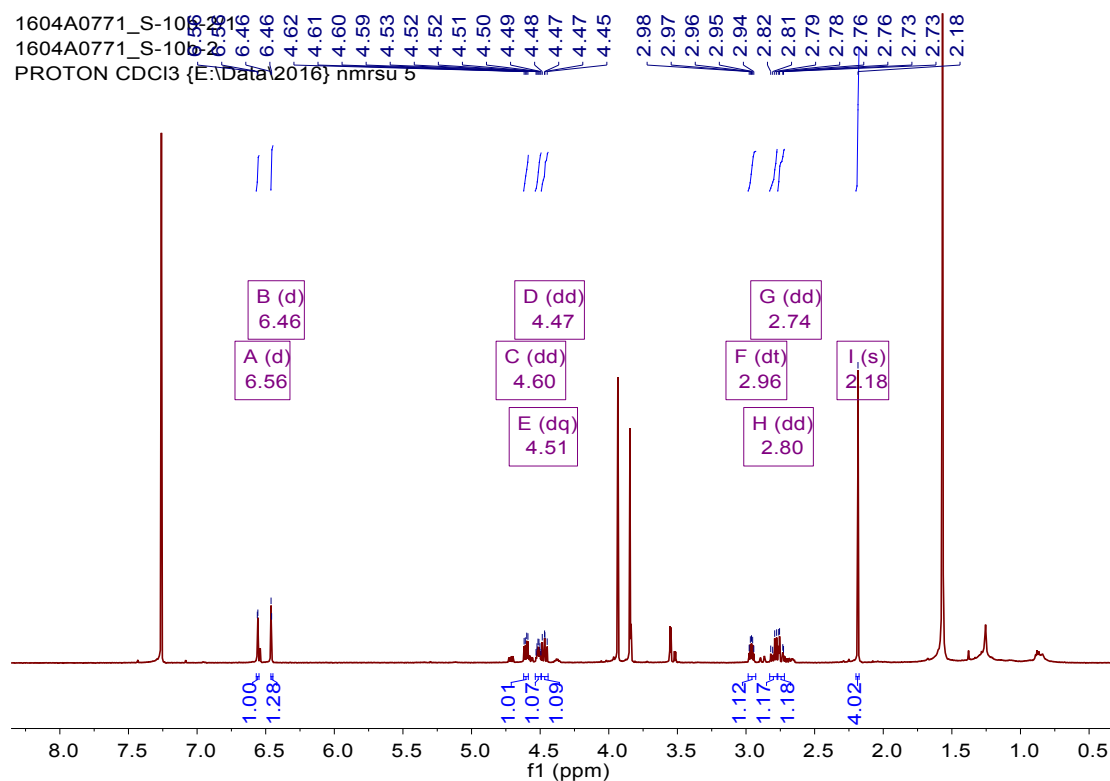

Figure S16 <sup>13</sup>C NMR spectrum (125 MHz, CDCl<sub>3</sub>) of diaporchromanone C (**3**)

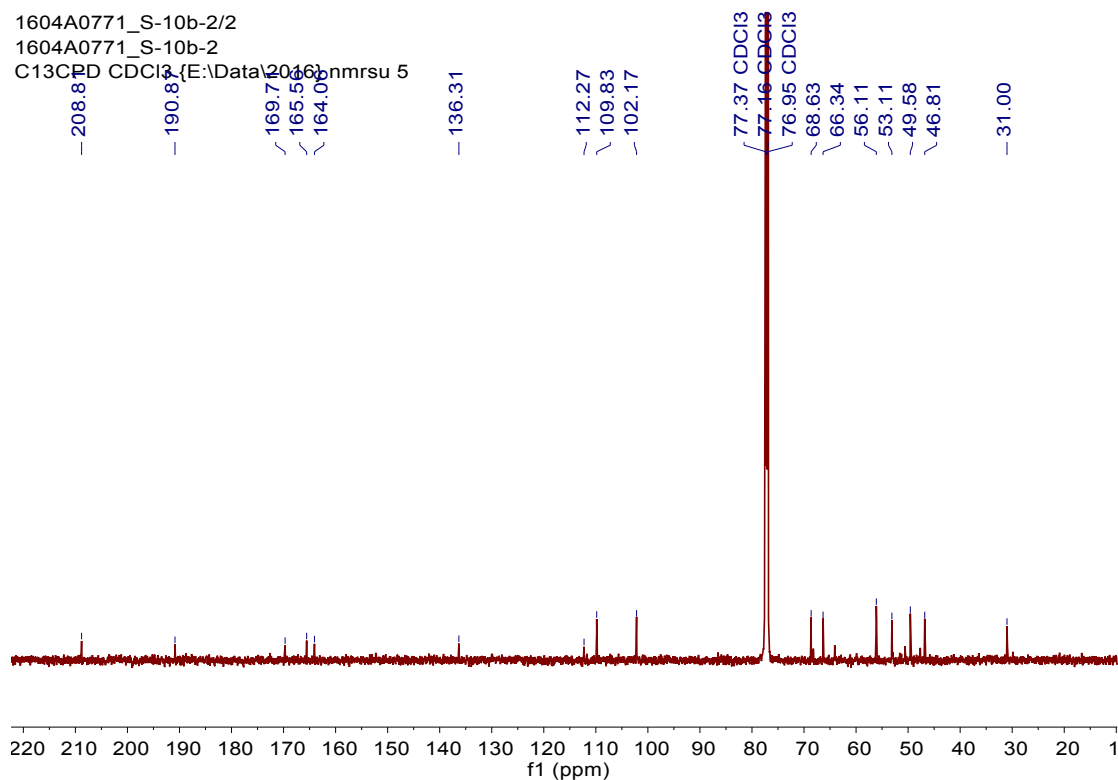

Figure S17  $^1\text{H}$ - $^1\text{H}$  COSY spectrum (500 MHz,  $\text{CDCl}_3$ ) of diaporchromanone C (**3**)

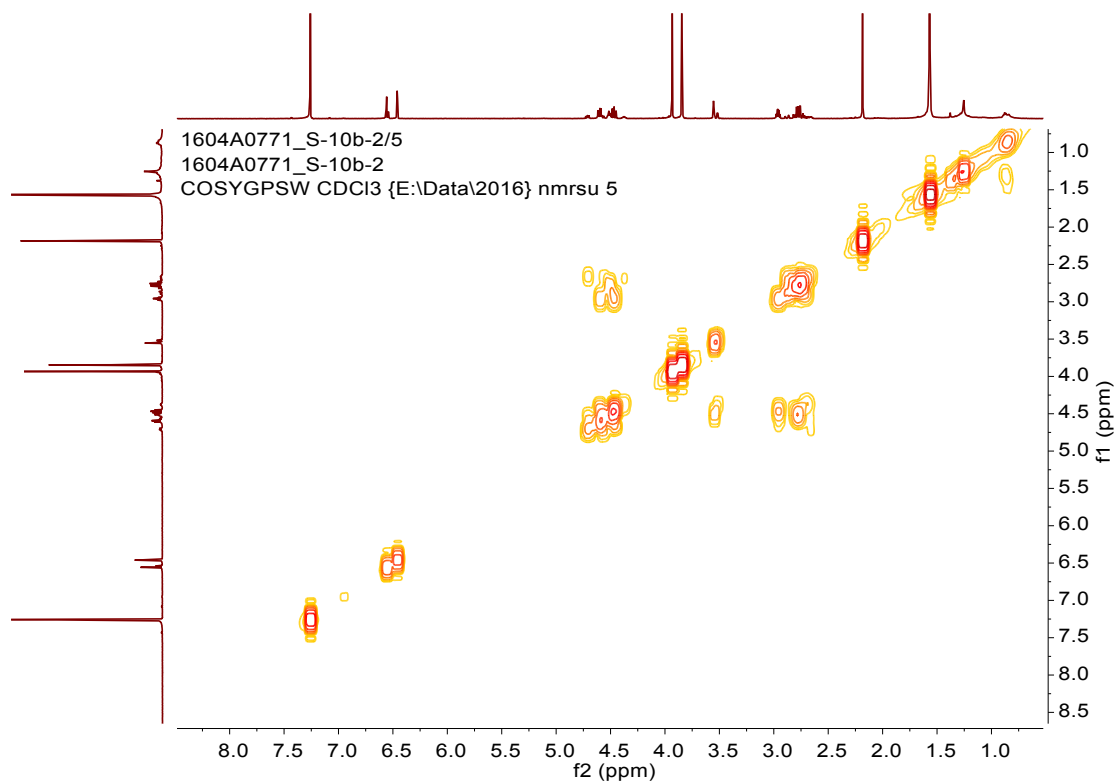

Figure S18 HSQC spectrum (500 MHz,  $\text{CDCl}_3$ ) of diaporchromanone C (**3**)

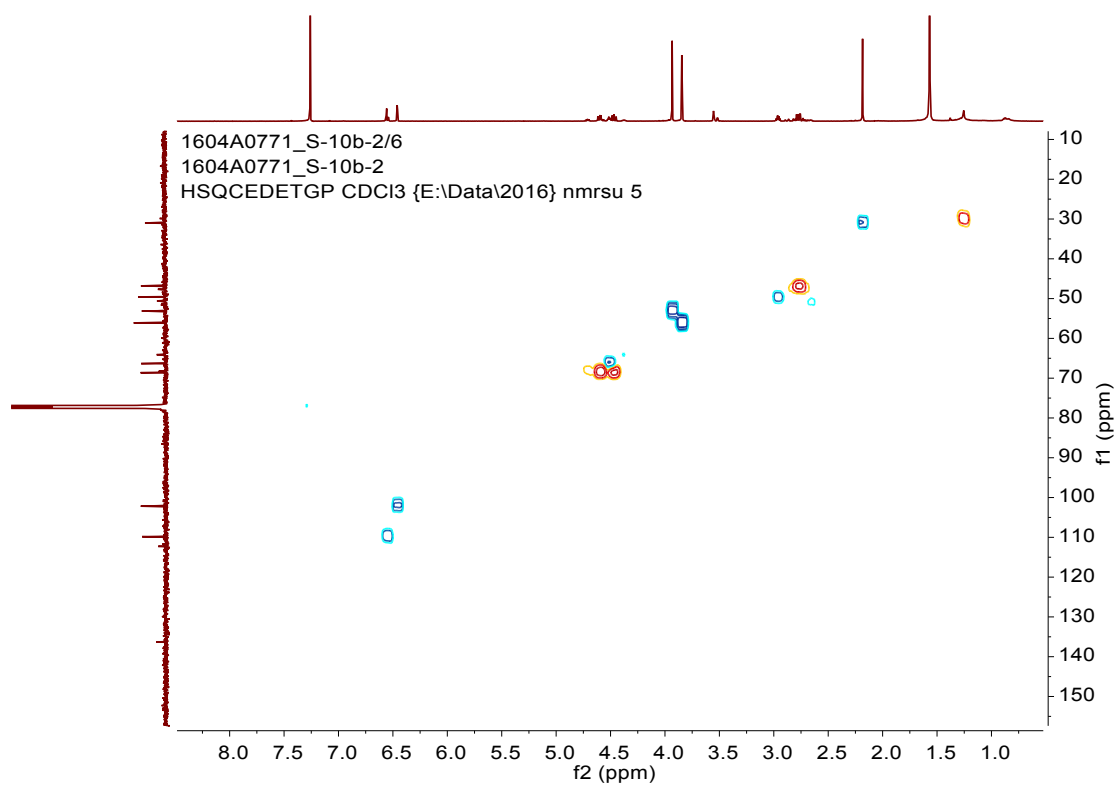

Figure S19 HMBC spectrum (500 MHz, CDCl<sub>3</sub>) of diaporchromanone C (**3**)

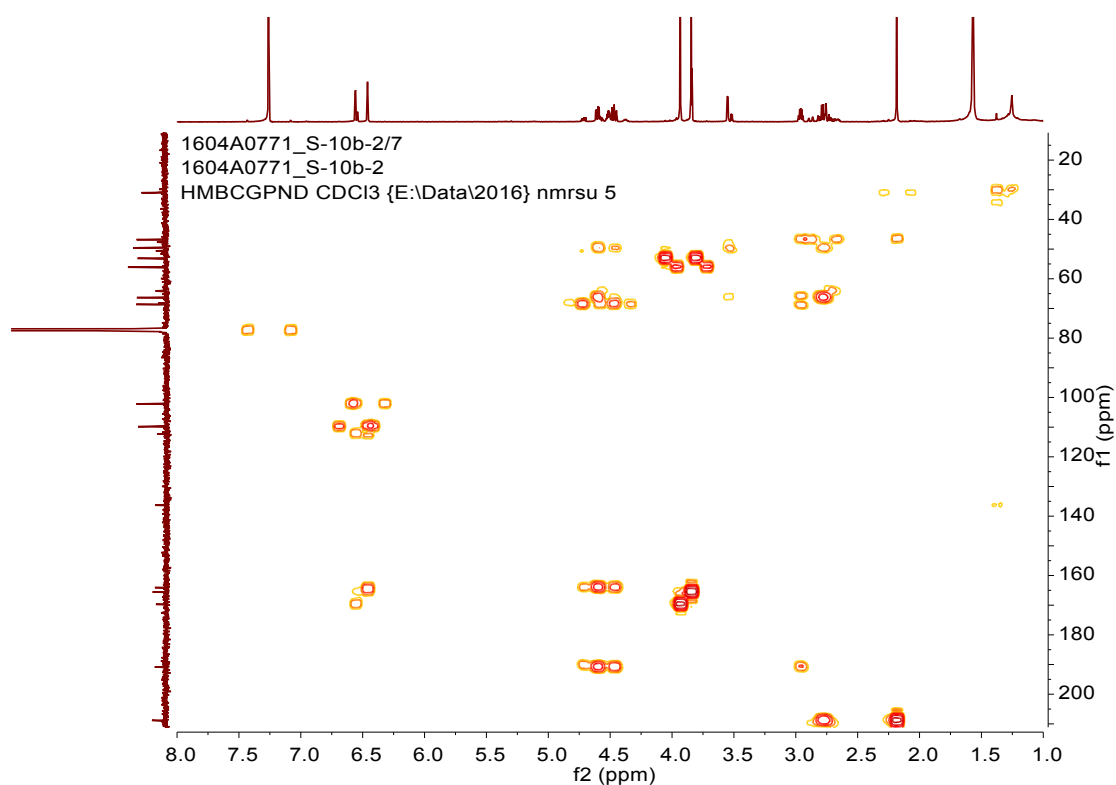

Figure S20 HRESIMS of diaporchromanone D (**4**)

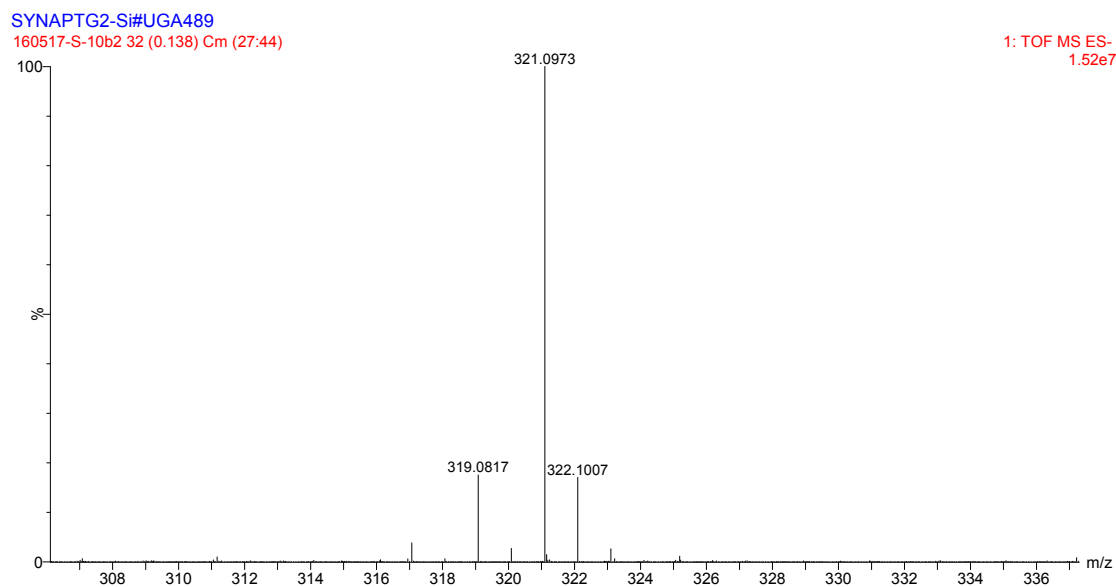

### Elemental Composition Report

#### Single Mass Analysis

Tolerance = 5.0 PPM / DBE: min = -1.5, max = 50.0

Elements Used: C: 0-50 H: 0-100 O: 0-50

| Mass     | Calc. Mass | mDa  | PPM  | DBE | Formula                                        |
|----------|------------|------|------|-----|------------------------------------------------|
| 321.0973 | 321.0974   | -0.1 | -0.3 | 8.5 | C <sub>16</sub> H <sub>17</sub> O <sub>7</sub> |

Figure S21 <sup>1</sup>H NMR spectrum (500 MHz, CDCl<sub>3</sub>) of diaporchromanone D (**4**)

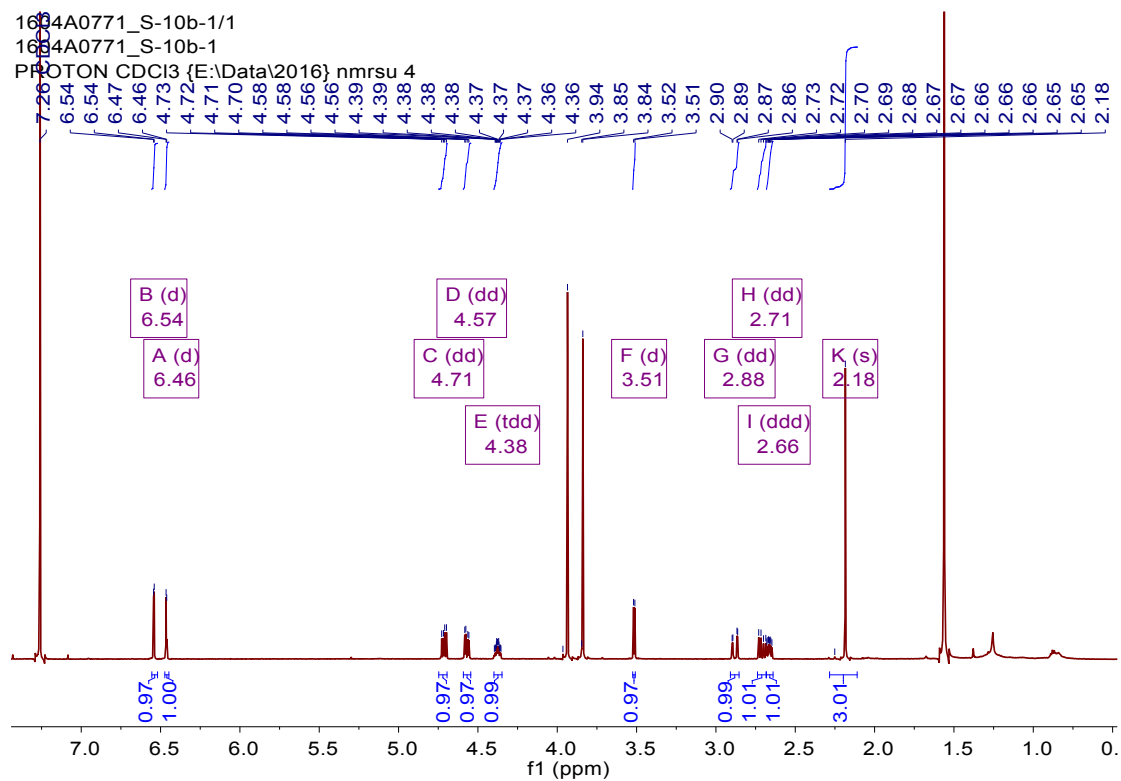

Figure S22 <sup>13</sup>C NMR spectrum (125 MHz, CDCl<sub>3</sub>) of diaporchromanone D (**4**)

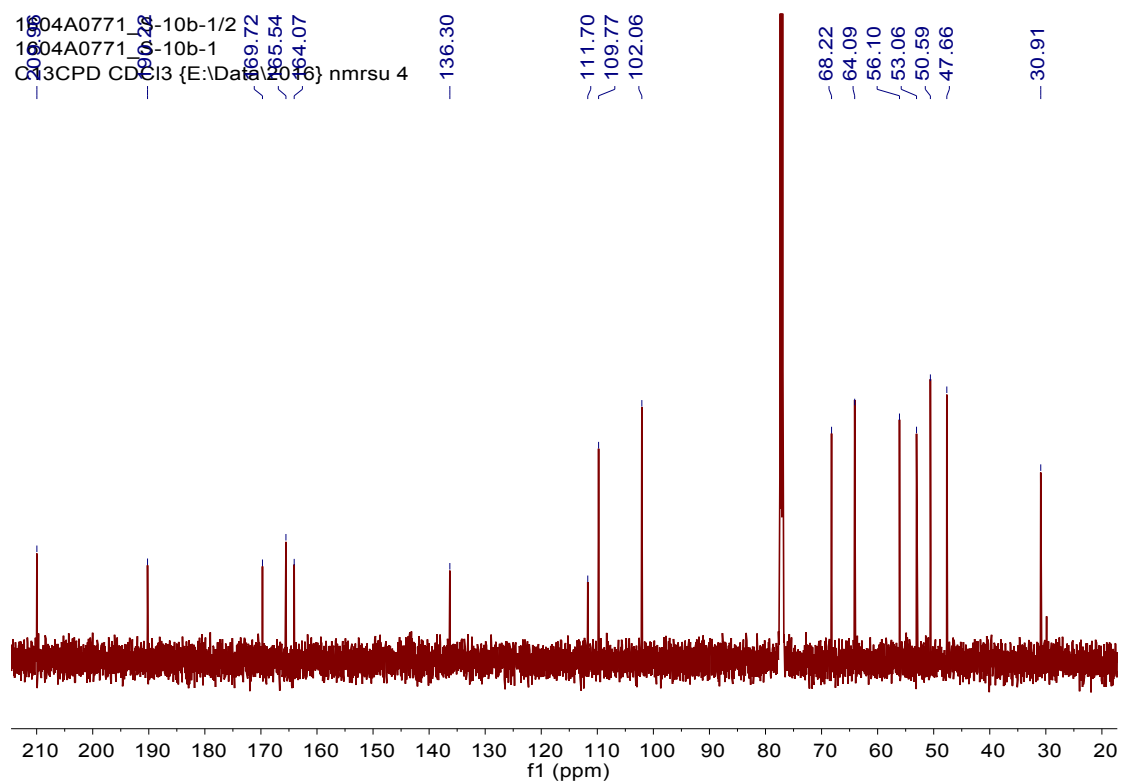

Figure S23  $^1\text{H}$ - $^1\text{H}$  COSY spectrum (500 MHz,  $\text{CDCl}_3$ ) of diaporchromanone D (**4**)

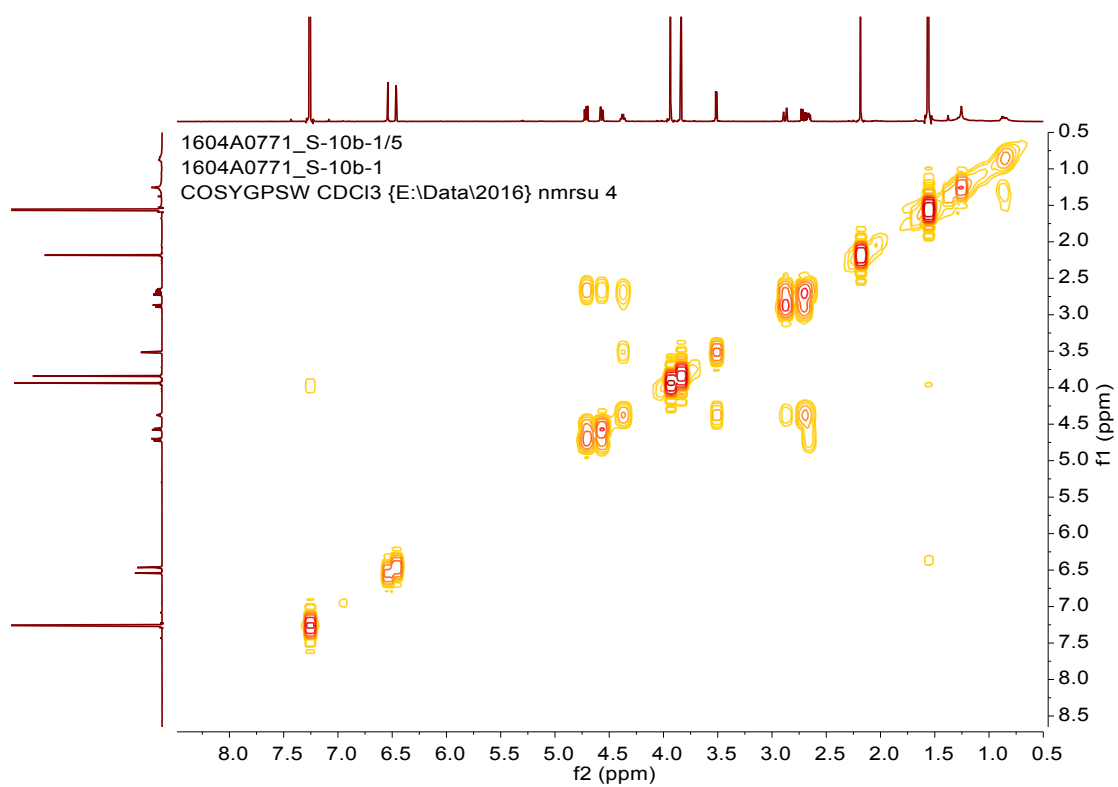

Figure S24 HSQC spectrum (500 MHz,  $\text{CDCl}_3$ ) of diaporchromanone D (**4**)

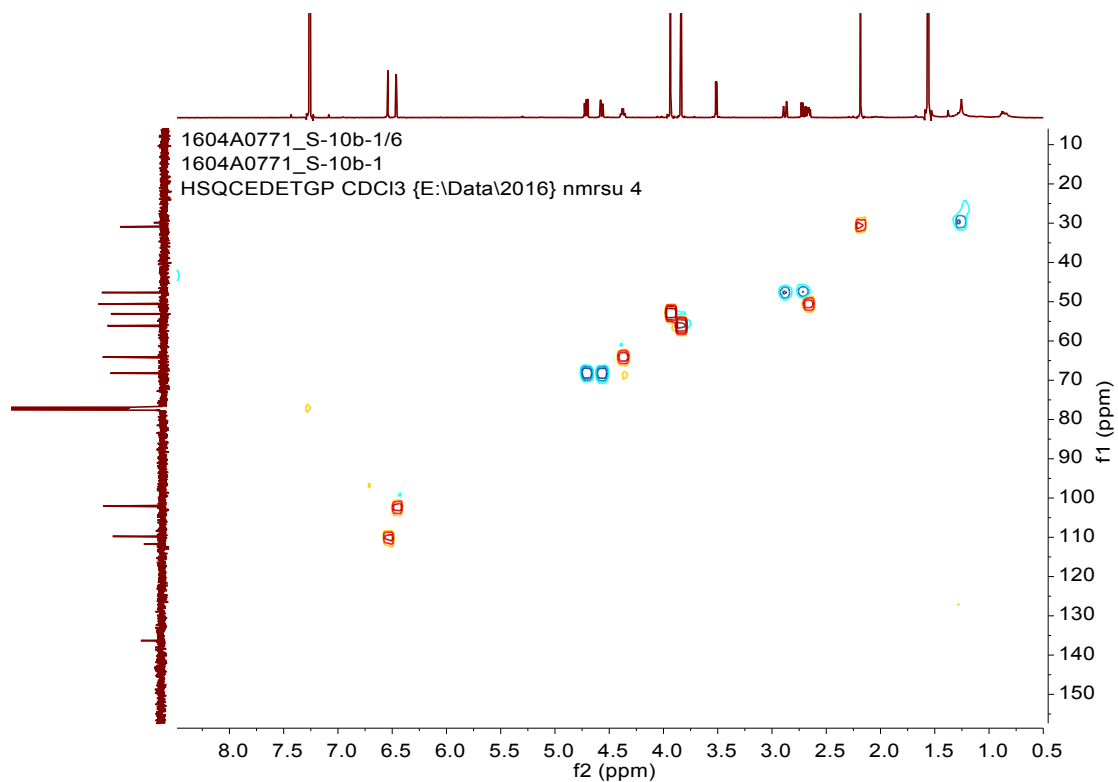



Figure S25 HMBC spectrum (500 MHz, CDCl<sub>3</sub>) of diaporchromanone D (**4**)

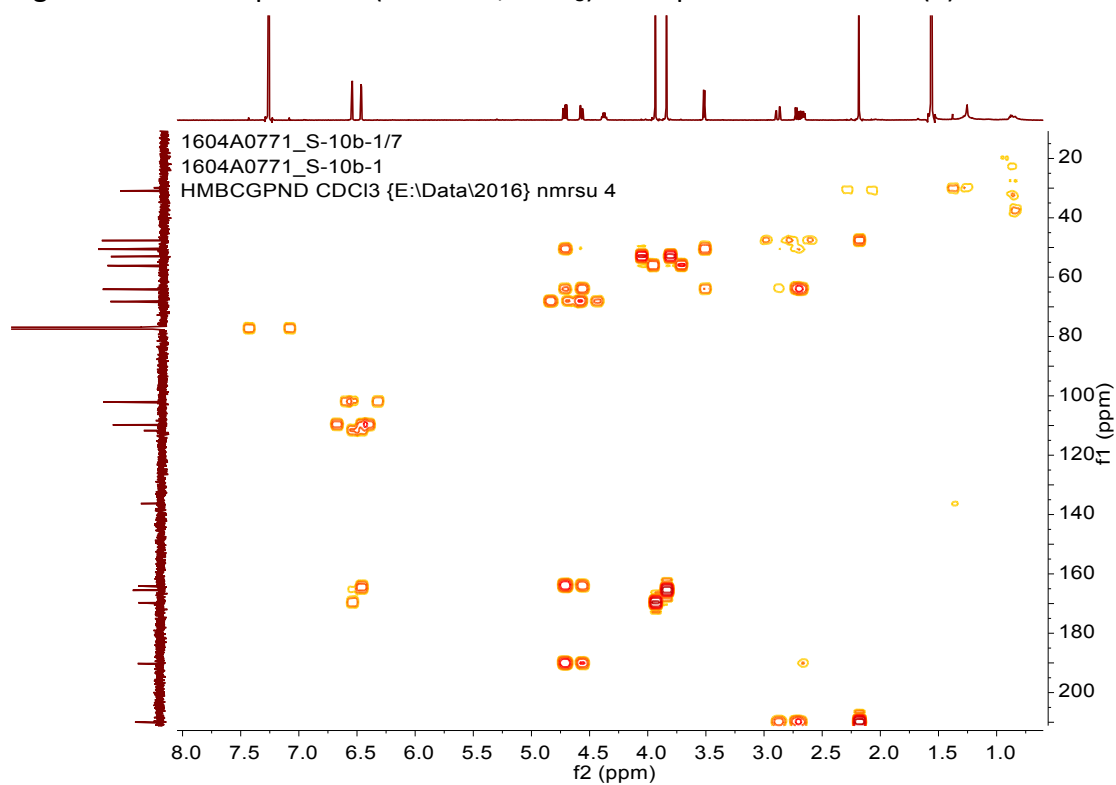

Figure S26 HRESIMS of (–) phomopsichin A (**5a**)

SYNAPT2-Si#UGA489

160517-S-11a-1 22 (0.102) Cm (21:22)

1: TOF MS ES-  
5.13e6

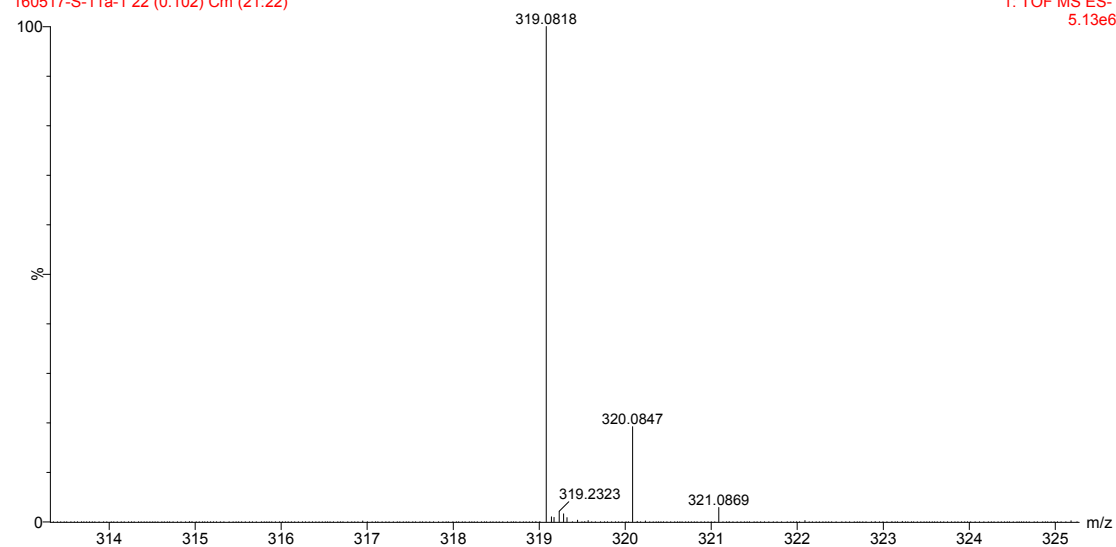

#### Elemental Composition Report

#### Single Mass Analysis

Tolerance = 5.0 PPM / DBE: min = -1.5, max = 50.0

| Elements Used: |            | C: 0-50 | H: 0-100 | O: 0-50 |                                                |
|----------------|------------|---------|----------|---------|------------------------------------------------|
| Mass           | Calc. Mass | mDa     | PPM      | DBE     | Formula                                        |
| 319.0818       | 319.0818   | 0.0     | 0.0      | 9.5     | C <sub>16</sub> H <sub>15</sub> O <sub>7</sub> |

Figure S27 <sup>1</sup>H NMR spectrum (500 MHz, acetone-*d*<sub>6</sub>) of (–)-phomopsichin A (**5a**)

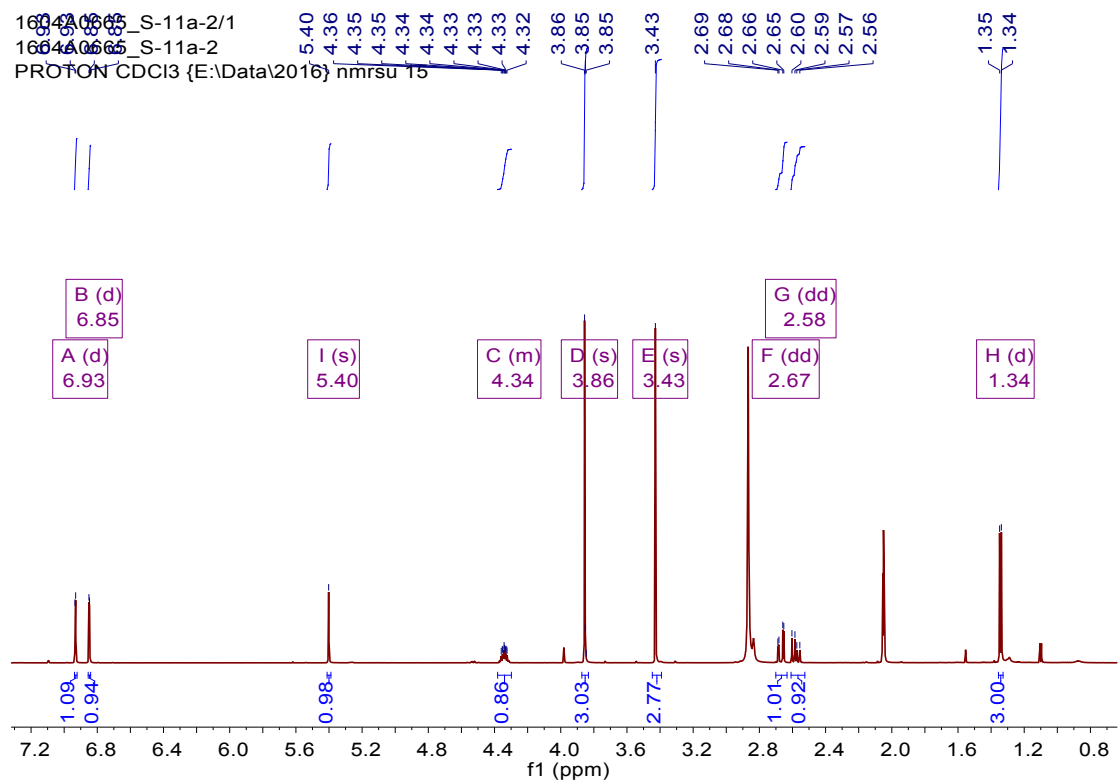

Figure S28 <sup>13</sup>C NMR spectrum (125 MHz, acetone-*d*<sub>6</sub>) of (–)-phomopsichin A (**5a**)

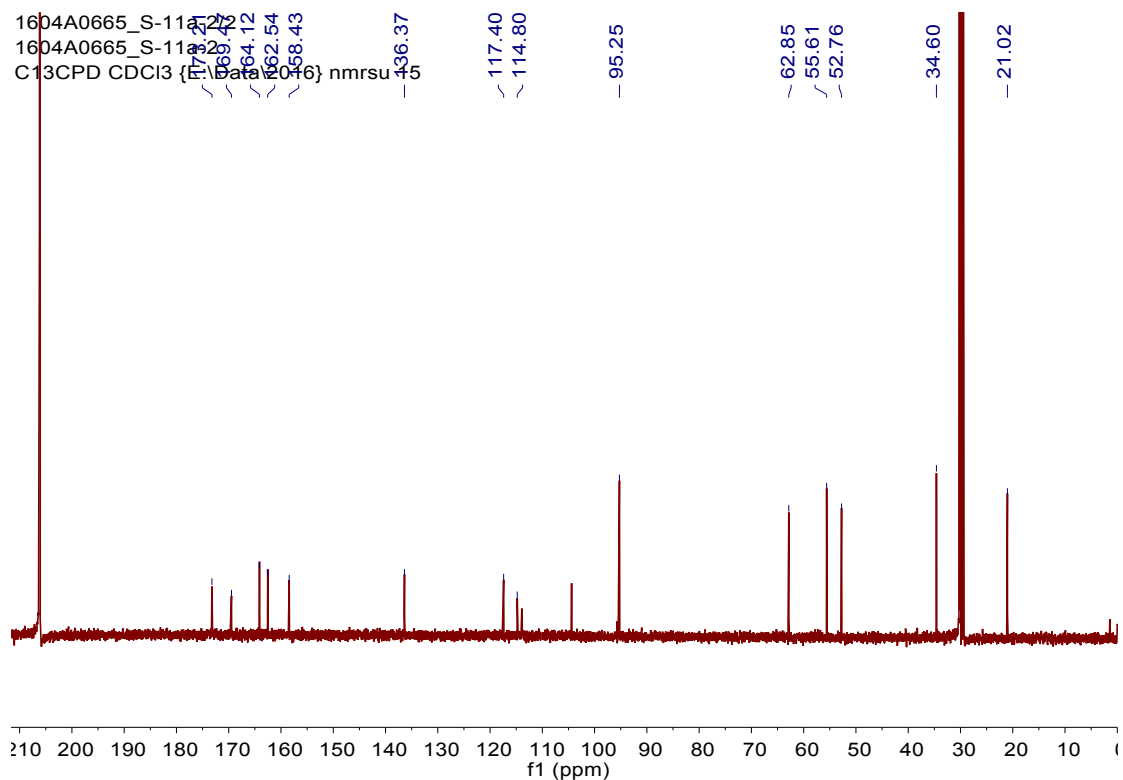

Figure S29  $^1\text{H}$ - $^1\text{H}$  COSY spectrum (500 MHz, acetone- $d_6$ ) of (-)-phomopsichin A (**5a**)

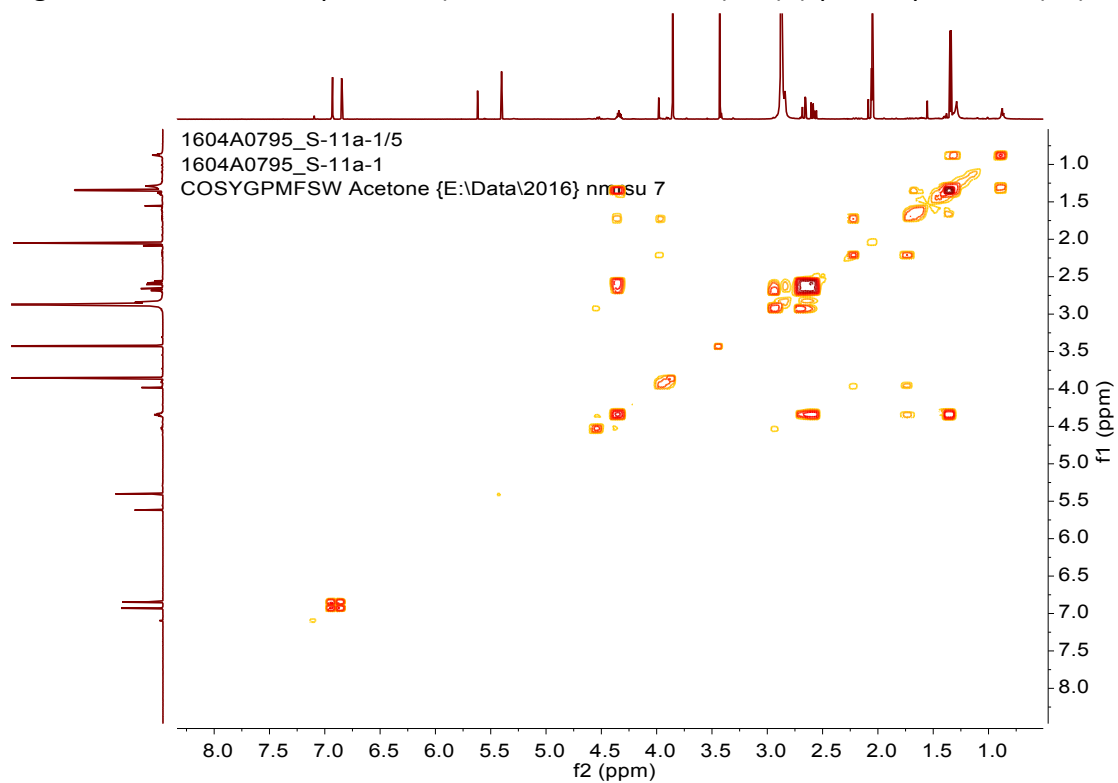

Figure S30 HSQC spectrum (500 MHz, acetone- $d_6$ ) of (-)-phomopsichin A (**5a**)

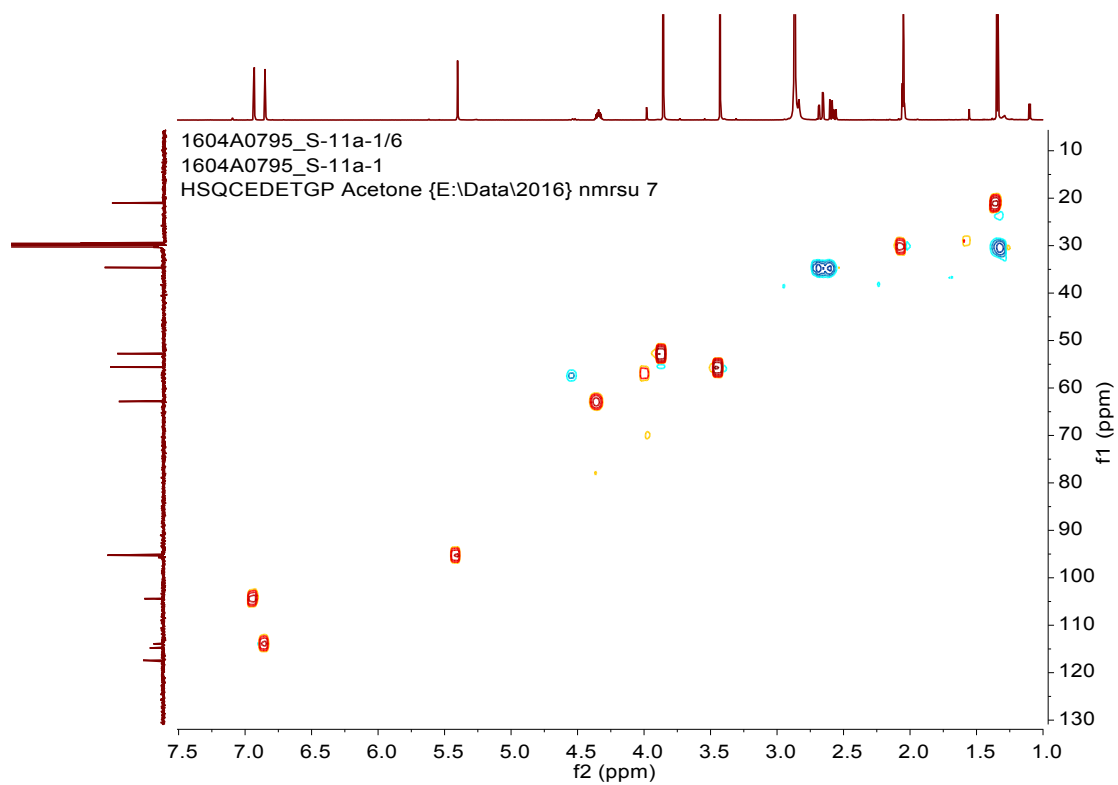

Figure S31 HMBC spectrum (500 MHz, acetone-*d*<sub>6</sub>) of (–)-phomopsichin A (5a)

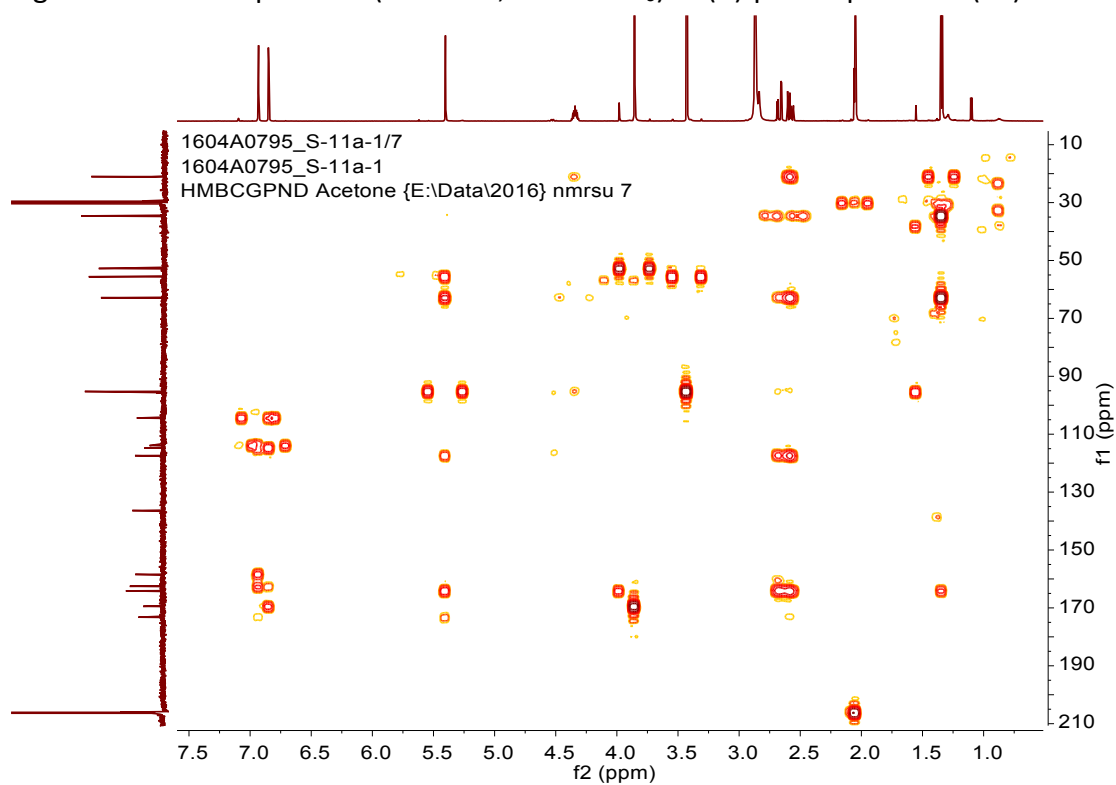

Figure S32 HRESIMS of (+)-phomopsichin B (6a)

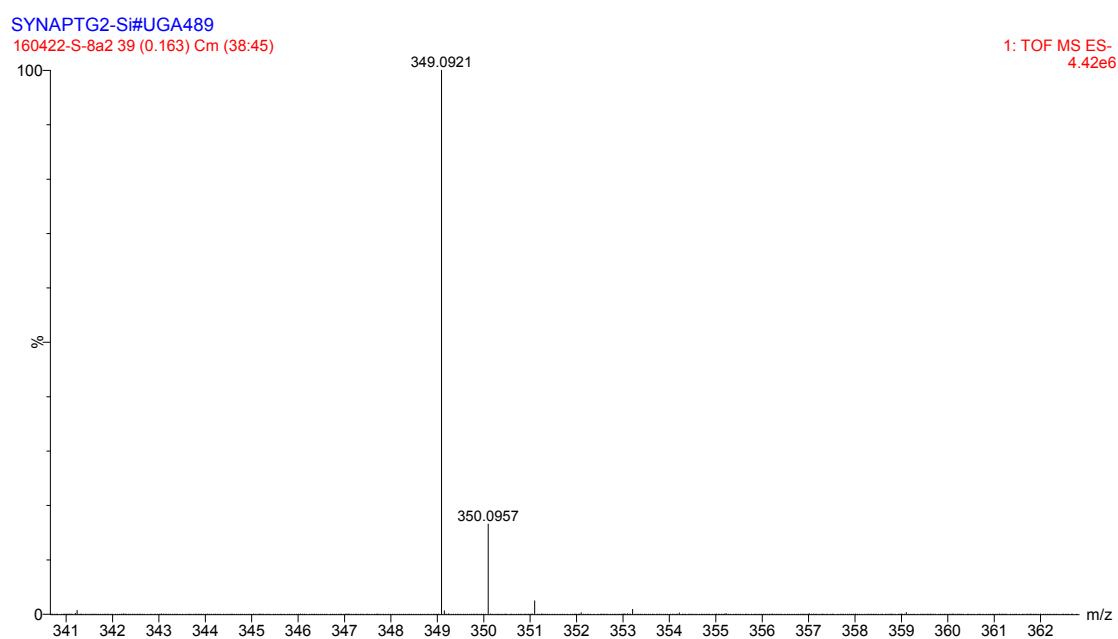

### Elemental Composition Report

#### Single Mass Analysis

Tolerance = 4.0 PPM DBE: min = -1.5, max = 50.0

C: 0-50 H: 0-100 O: 0-50

| Mass     | Calc. Mass | mDa  | PPM  | DBE | Formula                                        |
|----------|------------|------|------|-----|------------------------------------------------|
| 349.0921 | 349.0923   | -0.2 | -0.6 | 9.5 | C <sub>17</sub> H <sub>17</sub> O <sub>8</sub> |

Figure S33  $^1\text{H}$  NMR spectrum (500MHz,  $\text{CDCl}_3$ ) of (+)-phomopsichin B (**6a**)

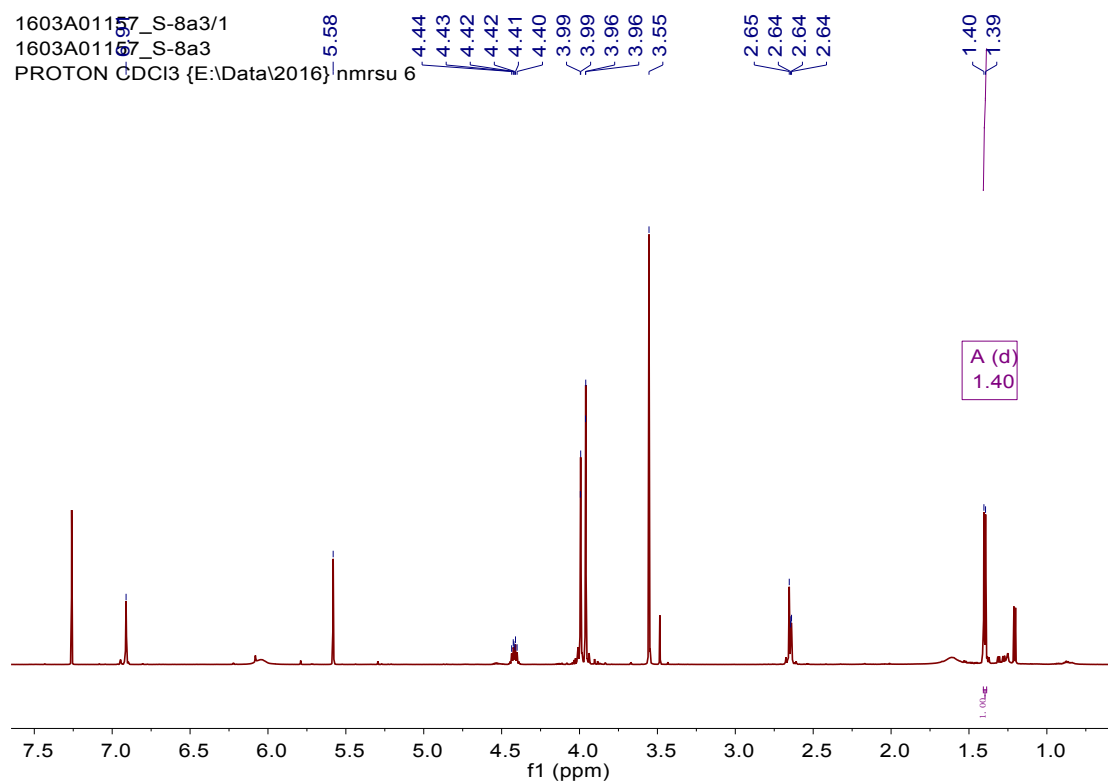

Figure S34  $^{13}\text{C}$  NMR spectrum (125 MHz,  $\text{CDCl}_3$ ) of (+)-phomopsichin B (**6a**)

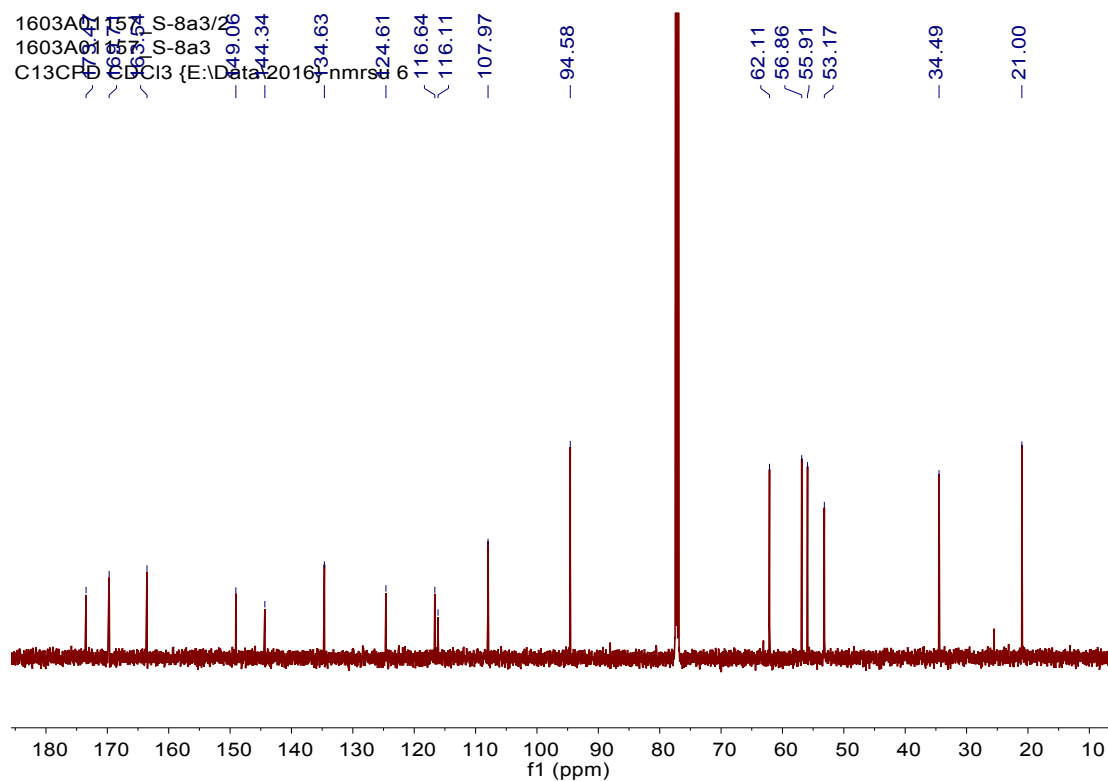

Figure S35  $^1\text{H}$ - $^1\text{H}$  COSY spectrum (500 MHz,  $\text{CDCl}_3$ ) of (+)-phomopsichin B (**6a**)

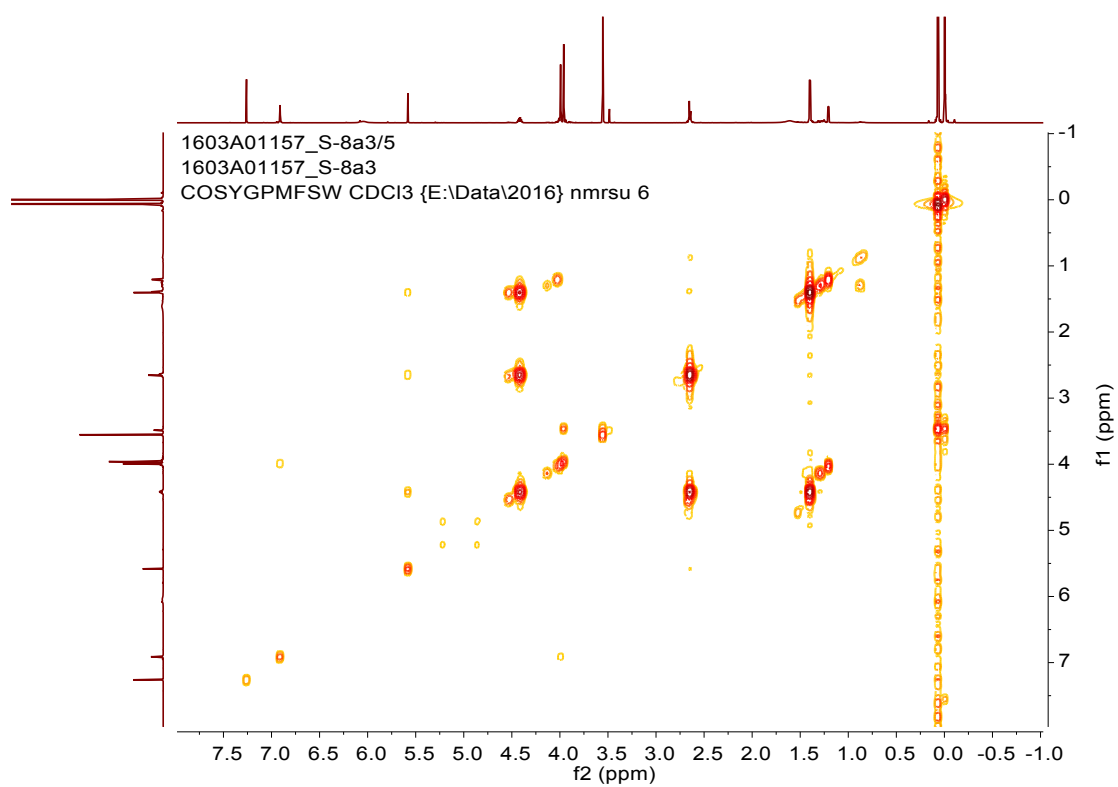

Figure S36 HSQC spectrum (500 MHz,  $\text{CDCl}_3$ ) of (+)-phomopsichin B (**6a**)

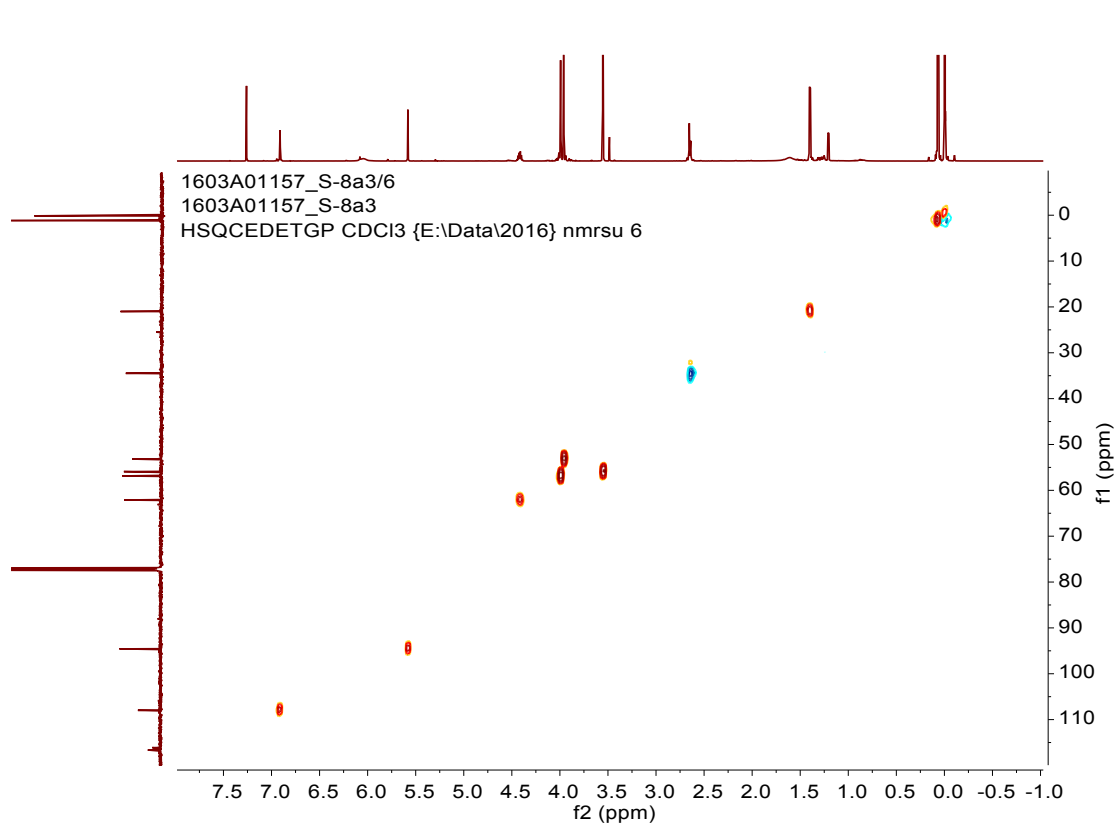

Figure S37 HMBC spectrum (500 MHz, CDCl<sub>3</sub>) of (+)-phomopsichin B (**6a**)

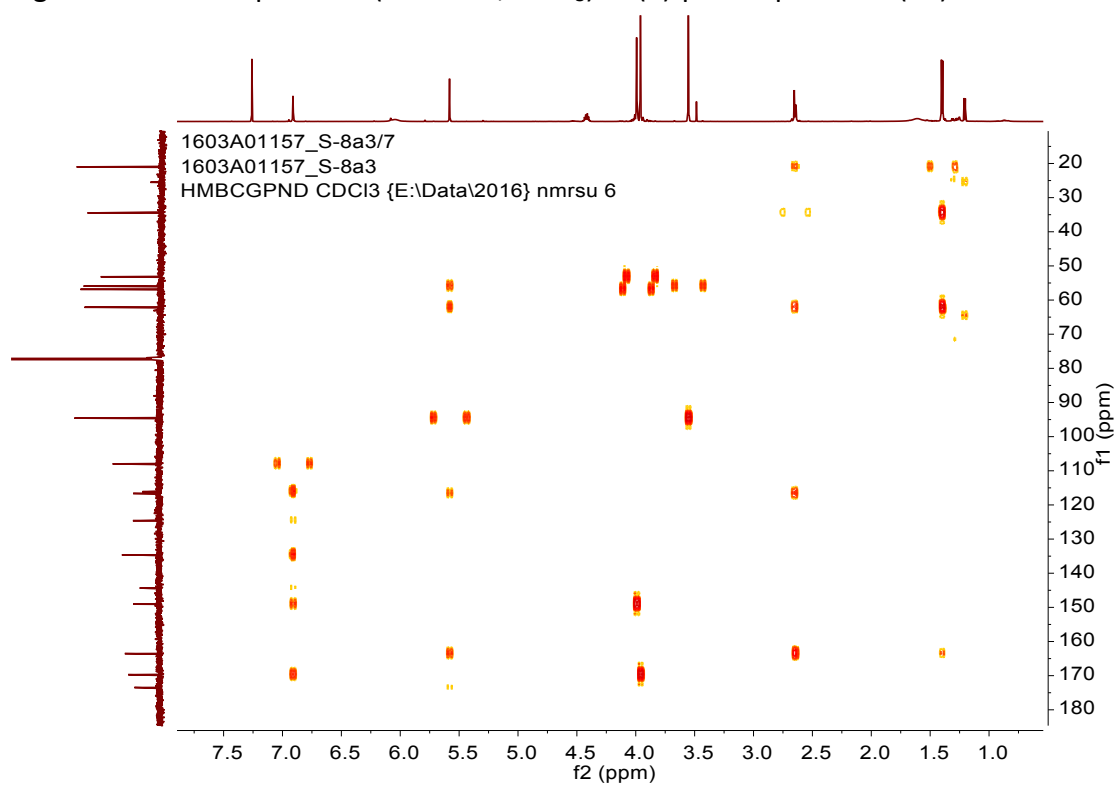

Figure S38 HRESIMS of (±)-diaporchromone A (**7**)

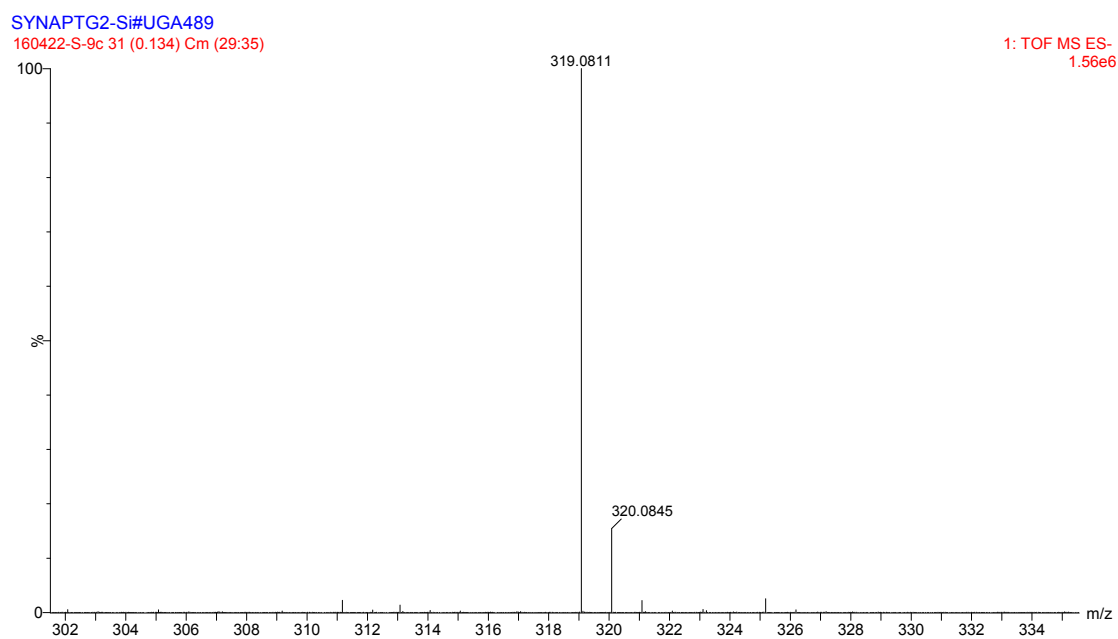

### Elemental Composition Report

#### Single Mass Analysis

Tolerance = 4.0 PPM / DBE: min = -1.5, max = 50.0

Monoisotopic Mass, Even Electron Ions

Elements Used:

C: 0-50 H: 0-100 O: 0-50

| Mass | Calc. Mass | mDa | PPM | Formula |
|------|------------|-----|-----|---------|
|------|------------|-----|-----|---------|

319.0811 319.0818 -0.7 -2.2 C<sub>16</sub>H<sub>15</sub>O<sub>7</sub>

Figure S39 <sup>1</sup>H NMR spectrum (500MHz, CDCl<sub>3</sub>) of (±)-diaporchromone A (7)

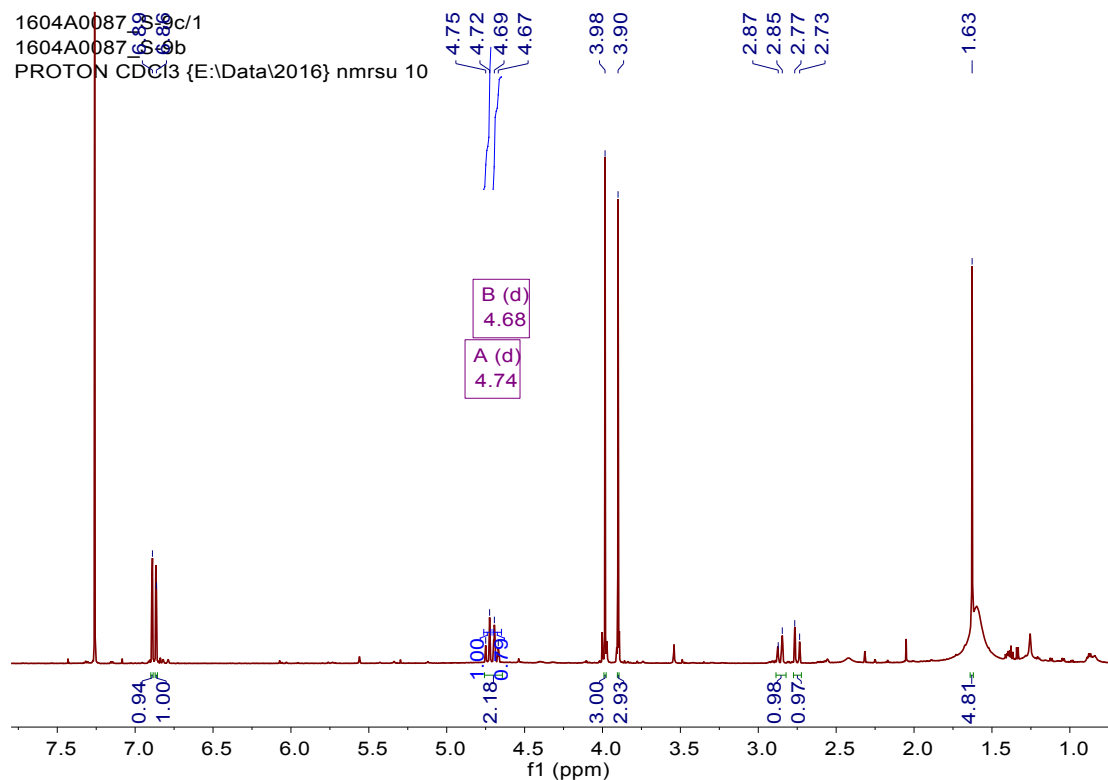

Figure S40 <sup>13</sup>C NMR spectrum (125 MHz, CDCl<sub>3</sub>) of (±)-diaporchromone A (7)

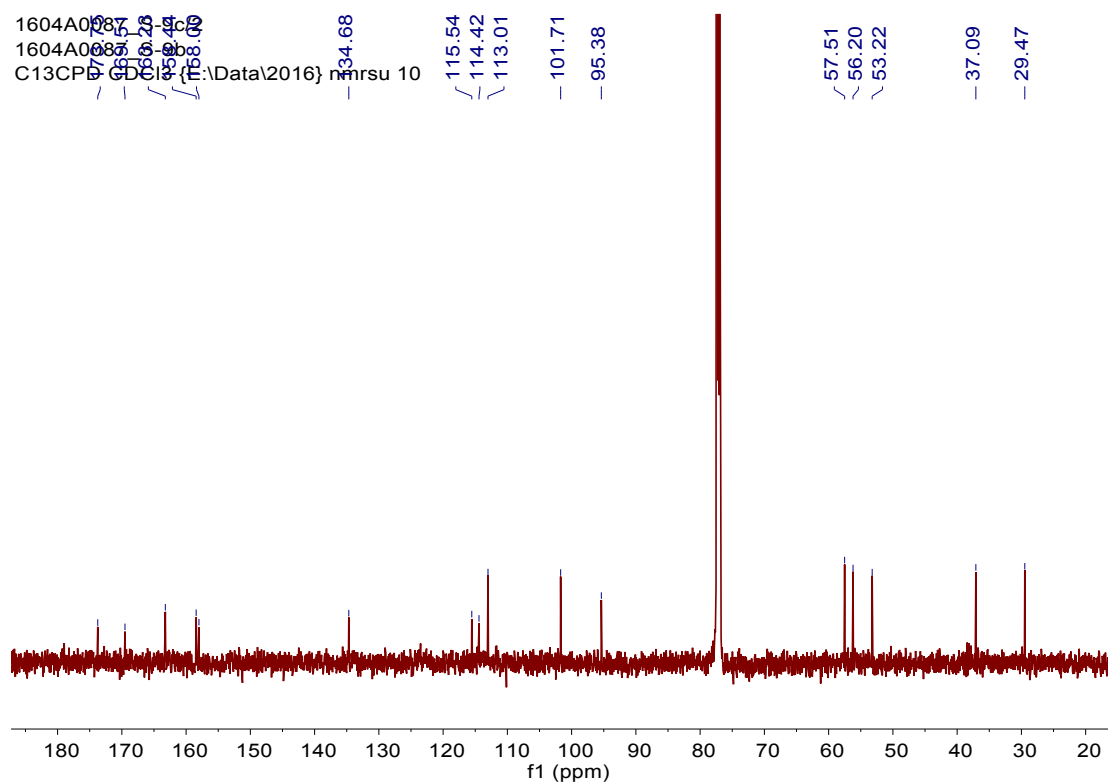



Figure S41 HSQC spectrum (500 MHz, CDCl<sub>3</sub>) of (±)-diaporchromone A (**7**)

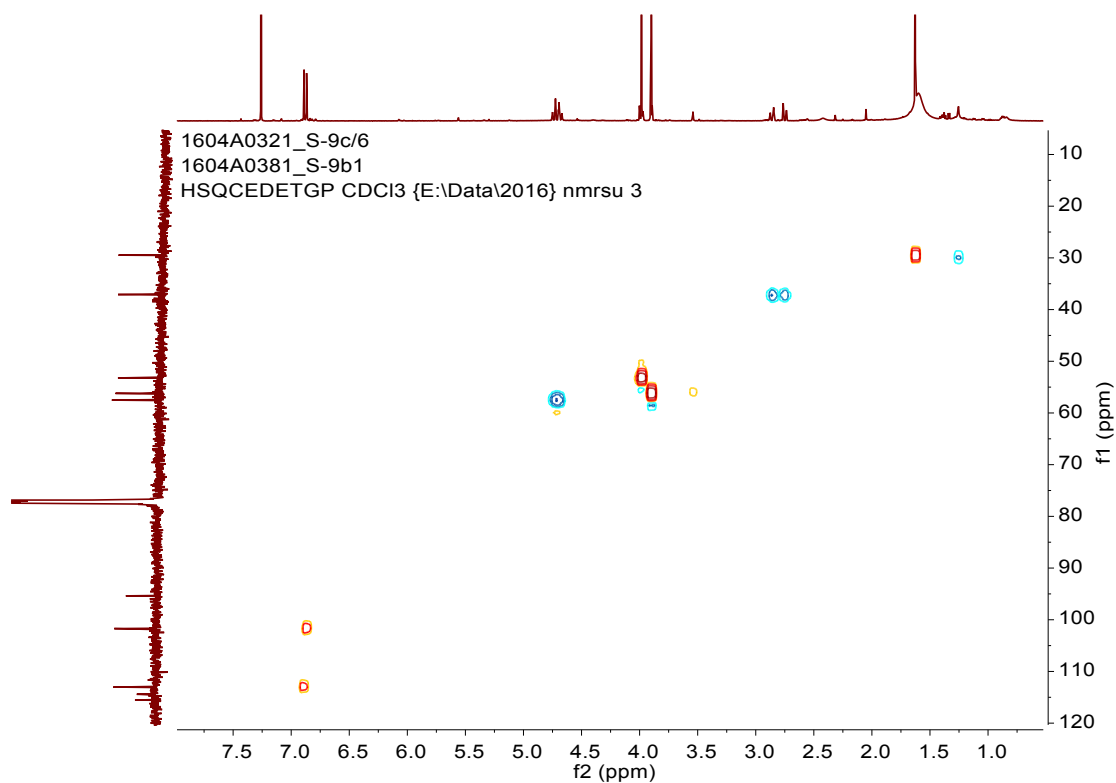

Figure S42 HSQC spectrum (500 MHz, CDCl<sub>3</sub>) of (±)-diaporchromone A (**7**)

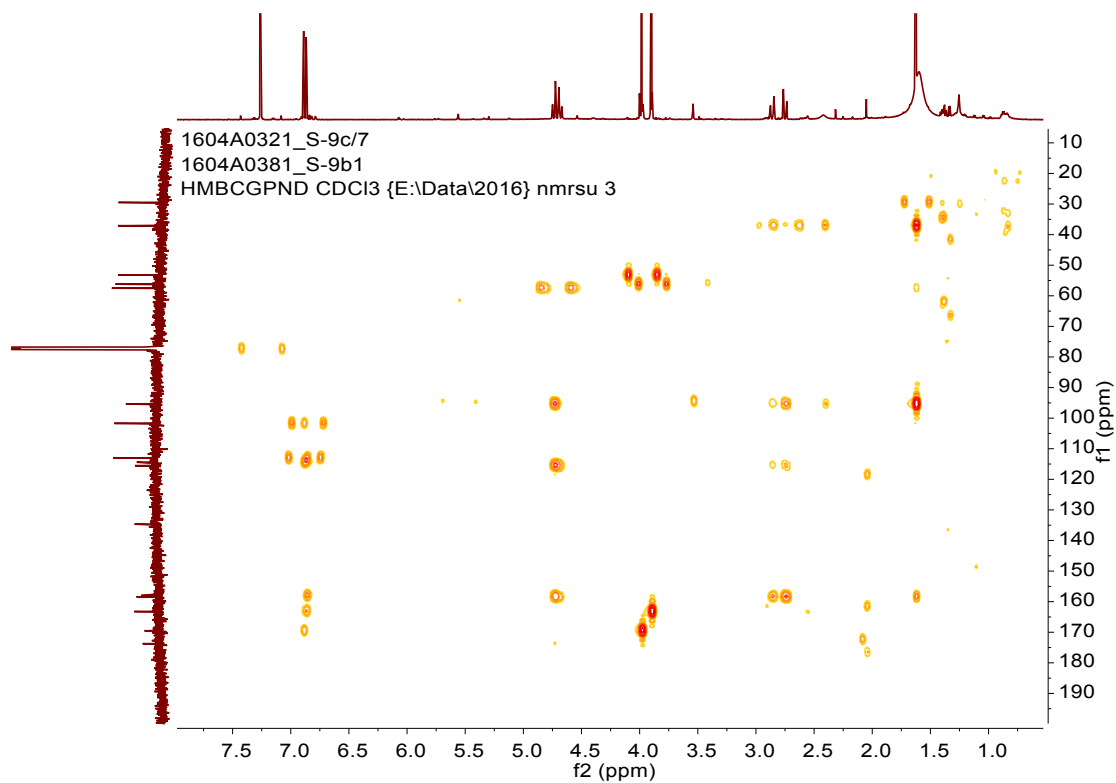

### Figure 43 ECD Calculation section

Conformational analysis was initially performed using Confab<sup>[1]</sup> at MMFF94 force field for one of the relative configurations for each compound. The conformers with Boltzmann-population of over 1% were chosen for ECD calculations. The energies and populations of all dominative conformers were provided in **Table 1**. The theoretical calculation was carried out using Gaussian 09<sup>[2]</sup>. First, the chosen conformer was optimized at B3LYP/6-311+g(2d,p) level, and conformers with low Boltzmann-populations were filtered. Then, the remaining conformers were further optimized at B3LYP/6-311+g(2d,p) in MeOH using the IEFPCM polarizable conductor calculation model. The theoretical calculation of ECD was conducted in MeOH using Time-dependent Density functional theory (TD-DFT) at the CAM-B3LYP/6-311+g(2d,p) level for compound **1**. Rotatory strengths for a total of 50 excited states were calculated. ECD spectra were generated using the program SpecDis 1.6 (University of Würzburg, Würzburg, Germany) and GraphPad Prism 5 (University of California San Diego, USA) from dipole-length rotational strengths by applying Gaussian band shapes with  $\sigma = 0.2$  eV<sup>[3]</sup>. All calculations were performed with the High-Performance Grid Computing Platform of Sun Yat-sen University.

**Table 1** The low energy conformers of the compound **1**.

| Conformers | Low energy structure                                                                | $\Delta E$<br>(Kcal/mol) | Boltzmann Dist<br>(%) |
|------------|-------------------------------------------------------------------------------------|--------------------------|-----------------------|
| RS-1-a     | 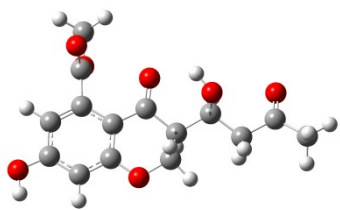 | 0                        | 63                    |
| RS-1-b     |  | 0.04                     | 37                    |

|        |                                                                                     |      |       |
|--------|-------------------------------------------------------------------------------------|------|-------|
| RR-1-a | 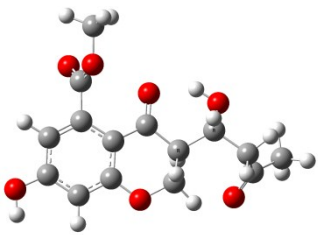   | 0    | 81    |
| RR-1-b |    | 0.58 | 19    |
| SR-1   |    | 0    | 100   |
| SS-1-a |   | 1.97 | 26.11 |
| SS-1-b |  | 0    | 73.9  |

---

## References

1. N. M. OBoyle, T. Vandermeersch, C. J. Flynn, A. R. Maguire and G. R. Hutchison. *J.Cheminformatics.*, 2011, 3, 3–8.
2. M. J. Frisch, G. W. Trucks, H. B. Schlegel, G. E. Scuseria, M. A. Robb, J. R. Cheeseman, G. Scalmani, V. Barone, B. Mennucci, G. A. Petersson, H. Nakatsuji, M. Caricato, X. Li, H. P. Hratchian, A. F. Izmaylov, J. Bloino, G. Zheng, J. L. Sonnenberg, M. Hada, M. Ehara, K. Toyota, R. Fukuda, J. Hasegawa, M. Ishida, T. Nakajima, Y. Honda, O. Kitao, H. Nakai, T. Vreven, J. A. Montgomery, Jr., J. E. Peralta, F. Ogliaro, M. Bearpark, J. J. Heyd, E. Brothers, K. N. Kudin, V. N. Staroverov, R. Kobayashi, J. Normand, K. Raghavachari, A. Rendell, J. C. Burant, S. S. Iyengar, J. Tomasi, M. Cossi, N. Rega, J. M. Millam, M. Klene, J. E. Knox, J. B. Cross, V. Bakken, C. Adamo, J. Jaramillo, R. Gomperts, R. E.

- Stratmann, O. Yazyev, A. J. Austin, R. Cammi, C. Pomelli, J. W. Ochterski, R. L. Martin, K. Morokuma, V. G. Zakrzewski, G. A. Voth, P. Salvador, J. J. Dannenberg, S. Dapprich, A. D. Daniels, O. Farkas, J. B. Foresman, J. V. Ortiz, J. Cioslowski, and D. J. Fox. Gaussian Inc. Wallingford CT, 2010.
3. T. Bruhn, A. Schaumlffl, Y. Hemberger and G. Bringmann. *Chirality*, 2013, 25, 243–249.
